# Supplementary material for: Low-density SNP markers with high prediction accuracy of genomic selection for bacterial wilt resistance in tomato
Source: Frontiers journal article supplement (doi:10.3389/fpls.2024.1402693), 2024-05-30
Supplement: Data_Sheet_1.pdf [file Data_Sheet_1.pdf]

## Supplementary Material

### Low-density SNP markers with high prediction accuracy of genomic selection to improve bacterial wilt resistance in tomato

Running title: Core sets of SNPs for genomic selection of bacterial wilt resistance in tomato

Jeyun Yeon<sup>1</sup>, Ngoc Thi Le<sup>1</sup>, Jaehun Heo<sup>1</sup>, and Sung-Chur Sim<sup>1,2\*</sup>

\* **Correspondence:** Sung-Chur Sim: sungchur@sejong.ac.kr

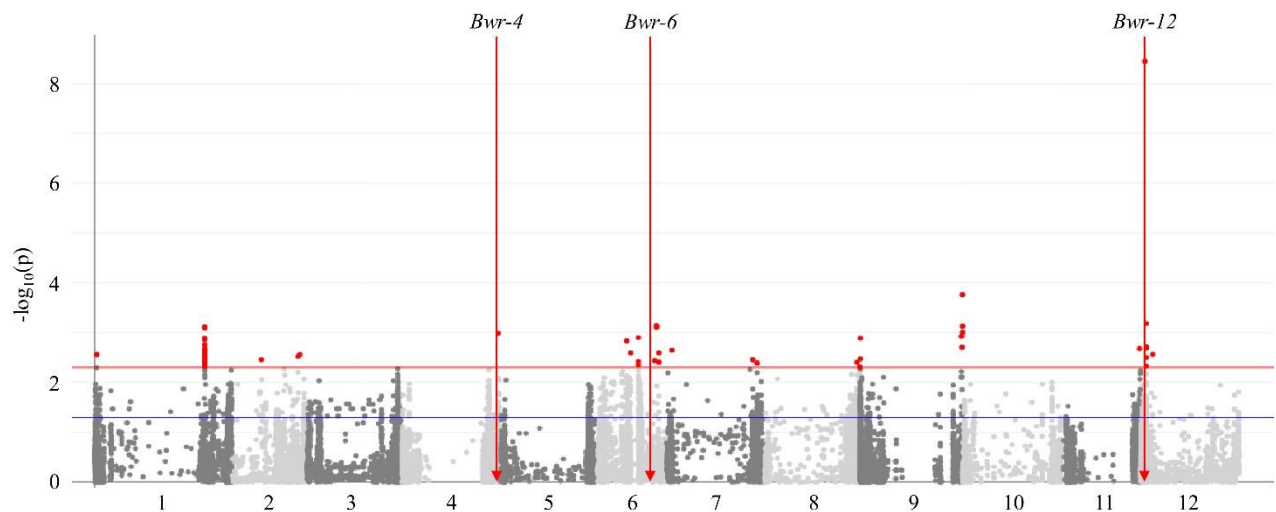

**Figure S1.** Manhattan plot of a genome-wide association study for bacterial wilt resistance in the combined population ( $n=353$ ). The horizontal lines indicate two thresholds of  $P < 0.005$  (red) and  $P < 0.05$ , (blue). A total of 31,142 genome-wide SNPs over 12 chromosomes are shown with gray dots and red dots represent SNPs significantly associated with bacterial wilt resistance at  $P < 0.005$ . The red arrows indicate the positions of SNPs associated with the major QTL, *Bwr-4*, *Bwr-6*, and *Bwr-12* (Nguyen et al., 2021).
