# Supplementary material for: Low-density SNP markers with high prediction accuracy of genomic selection for bacterial wilt resistance in tomato
Source: Front Plant Sci. 2024 May 30;15:1402693. doi: 10.3389/fpls.2024.1402693 (PMC11169939; doi:10.3389/fpls.2024.1402693)
Supplement: Supplementary file 2 [file Table_1.xlsx]

## Sheet: Table S1
Table S1. Description of 353 tomato accessions used in this study and their membership coefficients (Q matrix) at the best K (K=7) based on STRUCTURE analysis using the 31,142 SNPs.
No	Accession name	Country of origin	Growth type	STRUCTRUE cluster	Membership coefficients (K=7a)
					Q1	Q2	Q3	Q4	Q5	Q6	Q7
1	TGC1_039	India	Semi-determinate	1	1	0	0	0	0	0	0
2	TGC1_041	India	Determinate	1	1	0	0	0	0	0	0
3	TGC1_046	India	Determinate	1	1	0	0	0	0	0	0
4	TGC1_103	India	Determinate	1	1	0	0	0	0	0	0
5	TGC1_098	India	Semi-determinate	1	0.991	0.009	0	0	0	0	0
6	TGC1_078	India	Determinate	1	0.977	0.004	0	0.007	0.003	0.005	0.004
7	TGC1_047	India	Semi-determinate	1	0.919	0.081	0	0	0	0	0
8	TGC1_056	India	Determinate	1	0.903	0.097	0	0	0	0	0
9	TGC1_049	India	Determinate	1	0.898	0.012	0.03	0	0.003	0	0.057
10	TGC1_089	India	Determinate	1	0.869	0.071	0	0	0	0.06	0
11	TGC1_147	China	Determinate	1	0.718	0	0.044	0	0	0.238	0
12	TGC1_079	India	Determinate	1	0.653	0.046	0	0	0.301	0	0
13	TGC1_063	India	Determinate	1	0.594	0.09	0	0	0	0.316	0
14	TGC1_052	India	Determinate	1	0.542	0.088	0	0.002	0	0.366	0.001
15	TGC1_088	India	Determinate	1	0.536	0.261	0.145	0.012	0.042	0	0.003
16	TGC2_165	Korea	Indeterminate	1	0.514	0	0.05	0	0.412	0.023	0
17	TGC1_075	India	Determinate	1	0.511	0.255	0.087	0	0.146	0	0
18	TGC1_033	India	Determinate	1	0.499	0.283	0.156	0	0.061	0	0.001
19	TGC2_111	Korea	Indeterminate	1	0.499	0.238	0.203	0	0	0.059	0
20	TGC1_076	India	Semi-determinate	1	0.472	0.367	0.135	0	0.024	0	0.001
21	TGC1_040	India	Determinate	1	0.439	0.413	0	0	0	0.147	0
22	TGC1_062	India	Determinate	1	0.439	0.397	0	0.007	0	0.154	0.003
23	TGC1_051	India	Determinate	1	0.433	0.427	0	0	0	0.139	0
24	TGC1_061	India	Determinate	1	0.402	0.293	0.304	0	0	0	0
25	TGC2_136	Korea	Indeterminate	1	0.339	0.117	0	0.279	0.265	0	0.001
26	TGC1_027	India	Determinate	2	0	1	0	0	0	0	0
27	TGC1_006	Srilanka	Determinate	2	0	0.999	0	0	0	0	0.001
28	TGC1_025	India	Determinate	2	0	0.999	0.001	0	0	0	0.001
29	TGC2_167	Korea	Indeterminate	2	0	0.953	0	0	0	0.047	0
30	TGC1_067	Tunisie	Semi-determinate	2	0	0.896	0.074	0	0	0.03	0
31	TGC1_050	India	Determinate	2	0	0.872	0	0	0.128	0	0
32	TGC1_038	India	Determinate	2	0	0.871	0	0	0.129	0	0
33	TGC1_091	China	Determinate	2	0	0.868	0.132	0	0	0	0
34	TGC1_058	India	Determinate	2	0	0.867	0	0	0	0.03	0.104
35	TGC1_082	India	Determinate	2	0	0.867	0	0	0.133	0	0
36	TGC1_083	India	Determinate	2	0	0.861	0	0	0.139	0	0
37	TGC1_092	Turkey	Determinate	2	0	0.86	0.139	0	0	0	0
38	TGC2_082	China	Indeterminate	2	0	0.83	0.169	0	0	0	0
39	TGC1_100	India	Determinate	2	0	0.8	0.2	0	0	0	0
40	TGC1_043	Turkey	Determinate	2	0	0.799	0.196	0	0.002	0	0.003
41	TGC1_160	Turkey	Determinate	2	0	0.791	0	0	0	0.208	0
42	TGC1_161	Turkey	Determinate	2	0	0.791	0	0	0	0.209	0.001
43	TGC1_099	India	Determinate	2	0	0.79	0.21	0	0	0	0
44	TGC1_109	India	Determinate	2	0	0.758	0.104	0	0	0.137	0.001
45	TGC1_135	Unknown	Determinate	2	0	0.753	0.105	0	0	0.14	0.002
46	TGC1_118	India	Determinate	2	0	0.741	0	0	0.232	0	0.027
47	TGC1_120	India	Determinate	2	0	0.736	0	0	0.235	0	0.028
48	TGC1_086	India	Determinate	2	0.016	0.727	0.075	0	0	0.126	0.056
49	TGC1_070	India	Determinate	2	0	0.712	0.238	0	0	0.049	0.001
50	TGC1_140	India	Determinate	2	0	0.705	0.048	0	0	0.247	0
51	TGC1_104	India	Determinate	2	0.307	0.693	0	0	0	0	0.001
52	TGC1_066	Tunisie	Determinate	2	0	0.68	0.219	0	0.095	0.006	0
53	TGC2_039	US	Indeterminate	2	0.057	0.672	0.095	0.024	0	0.137	0.015
54	TGC1_069	Tunisie	Determinate	2	0	0.671	0.329	0	0	0	0
55	TGC1_087	China	Determinate	2	0	0.665	0.334	0	0	0	0
56	TGC1_112	India	Determinate	2	0.11	0.66	0.11	0.036	0	0.083	0.001
57	TGC1_107	India	Semi-determinate	2	0.097	0.654	0.248	0	0	0	0.001
58	TGC1_081	India	Determinate	2	0	0.645	0.345	0.01	0	0	0
59	TGC2_072	Uzbekistan	Indeterminate	2	0	0.643	0.218	0	0	0.14	0
60	TGC1_064	India	Determinate	2	0	0.633	0.061	0	0.265	0.041	0
61	TGC1_037	Unknown	Determinate	2	0	0.627	0.07	0	0.266	0.037	0
62	TGC1_105	India	Determinate	2	0.373	0.627	0	0	0	0	0
63	TGC1_158	India	Semi-determinate	2	0	0.626	0.373	0	0	0	0
64	TGC1_139	India	Determinate	2	0	0.622	0.068	0	0.27	0.04	0
65	TGC1_035	India	Semi-determinate	2	0	0.62	0.069	0	0.27	0.04	0
66	TGC1_162	Taiwan	Determinate	2	0	0.619	0	0	0.355	0	0.026
67	TGC1_113	India	Determinate	2	0.085	0.609	0.096	0.122	0.025	0.063	0
68	TGC1_153	China	Determinate	2	0	0.602	0.323	0	0	0.075	0
69	TGC1_053	India	Determinate	2	0	0.587	0.224	0	0.188	0	0
70	TGC1_071	India	Semi-determinate	2	0	0.569	0.218	0	0	0.213	0
71	TGC1_068	Tunisie	Determinate	2	0	0.56	0.248	0	0	0.192	0
72	TGC1_132	India	Determinate	2	0	0.549	0.169	0.126	0.156	0	0
73	TGC1_127	India	Determinate	2	0.136	0.543	0.215	0	0	0.065	0.041
74	TGC1_054	India	Determinate	2	0.075	0.533	0.385	0	0	0.006	0
75	TGC2_045	Russia	Indeterminate	2	0	0.527	0	0	0	0.454	0.019
76	TGC1_080	India	Determinate	2	0.021	0.525	0.204	0.038	0	0.206	0.005
77	TGC2_032	US	Indeterminate	2	0	0.523	0.433	0.007	0	0	0.037
78	TGC2_122	Korea	Indeterminate	2	0	0.522	0.433	0.008	0	0	0.037
79	TGC1_077	India	Semi-determinate	2	0.037	0.515	0	0.078	0.362	0.006	0.001
80	TGC1_085	Turkey	Determinate	2	0	0.509	0.491	0	0	0	0
81	TGC1_065	India	Determinate	2	0	0.459	0.383	0	0	0.15	0.008
82	TGC1_055	India	Determinate	2	0	0.45	0.154	0	0.079	0.316	0
83	TGC1_133	India	Determinate	2	0	0.442	0.225	0.097	0.042	0.194	0
84	TGC1_116	India	Semi-determinate	2	0.064	0.435	0.156	0	0.297	0.047	0
85	TGC1_057	India	Determinate	2	0.369	0.423	0.207	0	0	0	0
86	TGC1_094	China	Determinate	2	0.069	0.417	0	0.237	0.274	0	0.002
87	TGC1_045	India	Semi-determinate	2	0.106	0.4	0.295	0	0	0.176	0.023
88	TGC1_157	China	Semi-determinate	2	0	0.4	0.252	0.019	0.137	0.098	0.095
89	TGC1_111	India	Determinate	2	0.04	0.386	0.351	0.009	0	0.209	0.004
90	TGC1_117	India	Semi-determinate	2	0.085	0.362	0.206	0	0.279	0.067	0
91	TGC1_044	India	Semi-determinate	2	0.05	0.35	0.307	0	0	0.25	0.044
92	TGC1_028	India	Semi-determinate	2	0	0.319	0.185	0.118	0.189	0.093	0.096
93	TGC1_042	India	Semi-determinate	2	0.271	0.301	0.07	0	0.189	0.115	0.054
94	TGC1_130	Thailand	Determinate	3	0	0	1	0	0	0	0
95	TGC1_151	Thailand	Semi-determinate	3	0	0	1	0	0	0	0
96	TGC1_152	Thailand	Determinate	3	0	0	1	0	0	0	0
97	TGC1_154	China	Determinate	3	0	0	1	0	0	0	0
98	TGC1_138	Turkey	Determinate	3	0	0.078	0.921	0	0	0	0
99	TGC2_075	Uzbekistan	Indeterminate	3	0	0.094	0.906	0	0	0	0
100	TGC1_114	Turkey	Determinate	3	0.029	0.051	0.899	0	0	0	0.022
101	TGC2_074	Uzbekistan	Indeterminate	3	0	0.105	0.894	0	0	0	0
102	TGC2_001	US	Indeterminate	3	0.032	0.114	0.853	0	0	0	0
103	TGC2_079	China	Indeterminate	3	0	0	0.84	0	0.144	0.015	0.001
104	TGC1_146	China	Determinate	3	0	0	0.813	0	0.182	0.005	0
105	TGC2_160	Korea	Indeterminate	3	0	0	0.812	0	0	0.188	0
106	TGC2_086	Russia	Indeterminate	3	0	0	0.791	0	0	0.209	0
107	TGC1_115	Turkey	Determinate	3	0	0.12	0.783	0	0.097	0	0
108	TGC2_115	Korea	Indeterminate	3	0.118	0.03	0.78	0.041	0	0.03	0
109	TGC2_080	China	Indeterminate	3	0	0	0.76	0	0	0.24	0
110	TGC1_148	Israel	Determinate	3	0.027	0.202	0.687	0	0	0.003	0.082
111	TGC2_078	China	Indeterminate	3	0.164	0	0.685	0.086	0.002	0	0.064
112	TGC1_129	Israel	Determinate	3	0	0.336	0.664	0	0	0	0
113	TGC1_029	India	Semi-determinate	3	0.097	0.034	0.639	0.183	0	0.046	0
114	TGC2_083	Russia	Indeterminate	3	0	0.125	0.614	0	0	0.259	0.002
115	TGC2_177	Korea	Indeterminate	3	0	0	0.599	0	0.401	0	0
116	TGC2_178	Korea	Indeterminate	3	0	0	0.599	0	0.401	0	0
117	TGC1_156	China	Semi-determinate	3	0	0.125	0.597	0	0	0.276	0.002
118	TGC1_126	India	Semi-determinate	3	0.419	0	0.581	0	0	0	0
119	TGC2_081	China	Indeterminate	3	0	0	0.579	0.115	0.306	0	0
120	TGC2_116	Korea	Indeterminate	3	0.362	0	0.574	0.039	0.025	0	0
121	TGC2_176	Korea	Indeterminate	3	0.076	0	0.569	0.19	0	0	0.166
122	TGC1_110	India	Semi-determinate	3	0.236	0	0.558	0	0	0.023	0.183
123	TGC1_137	India	Determinate	3	0.236	0	0.558	0	0	0.023	0.182
124	TGC1_136	India	Determinate	3	0.235	0	0.556	0	0	0.026	0.182
125	TGC2_113	Korea	Indeterminate	3	0.074	0	0.553	0.029	0.032	0.294	0.018
126	TGC1_134	India	Determinate	3	0.235	0	0.552	0	0	0.03	0.182
127	TGC2_168	Korea	Indeterminate	3	0.277	0	0.51	0.036	0.056	0.077	0.044
128	TGC1_093	India	Determinate	3	0	0.119	0.5	0	0.097	0.239	0.044
129	TGC1_072	India	Determinate	3	0.001	0.044	0.49	0.073	0	0.295	0.097
130	TGC2_048	Russia	Indeterminate	3	0.023	0.117	0.488	0	0	0.36	0.011
131	TGC1_036	India	Determinate	3	0	0	0.48	0	0.276	0.244	0
132	TGC1_124	India	Determinate	3	0	0	0.479	0	0.279	0.242	0
133	TGC1_159	India	Semi-determinate	3	0	0.257	0.459	0	0.218	0.065	0.001
134	TGC1_108	India	Determinate	3	0.037	0.413	0.446	0	0	0.06	0.043
135	TGC1_030	India	Determinate	3	0	0.173	0.444	0.182	0.061	0.13	0.01
136	TGC1_155	India	Semi-determinate	3	0	0.182	0.442	0	0.376	0	0
137	TGC2_146	Korea	Indeterminate	3	0.027	0.11	0.436	0.046	0.208	0.127	0.045
138	TGC2_059	Russia	Indeterminate	3	0	0.072	0.426	0	0.364	0.139	0
139	TGC2_036	US	Indeterminate	3	0.198	0	0.416	0.02	0	0.366	0
140	TGC1_141	India	Determinate	3	0.268	0.326	0.406	0	0	0	0
141	TGC2_147	Korea	Indeterminate	3	0.045	0	0.373	0.106	0.334	0.041	0.1
142	TGC2_189	Korea	Indeterminate	3	0.092	0.088	0.373	0	0.362	0	0.084
143	TGC1_123	India	Determinate	3	0.001	0.128	0.364	0.053	0.097	0.275	0.083
144	TGC1_131	China	Determinate	3	0	0.239	0.363	0.033	0.207	0	0.158
145	TGC1_073	India	Semi-determinate	3	0	0.323	0.349	0	0.206	0.025	0.097
146	TGC1_074	India	Determinate	3	0	0.326	0.334	0	0.207	0.028	0.104
147	TGC1_031	India	Semi-determinate	3	0.102	0.179	0.32	0.106	0.293	0	0
148	TGC1_121	India	Determinate	3	0.212	0.194	0.266	0	0.067	0.215	0.046
149	TGC1_019	India	Determinate	4	0	0	0	1	0	0	0
150	TGC2_015	US	Indeterminate	4	0	0	0	0.999	0	0	0.001
151	TGC1_018	India	Determinate	4	0	0	0	0.912	0	0	0.088
152	TGC1_005	Unknown	Determinate	4	0	0.032	0	0.889	0	0	0.079
153	TGC2_144	Korea	Indeterminate	4	0	0	0	0.885	0	0	0.115
154	TGC1_004	Unknown	Determinate	4	0	0.007	0	0.883	0	0	0.11
155	TGC1_090	Unknown	Determinate	4	0	0	0	0.869	0.061	0.07	0
156	TGC2_149	Korea	Indeterminate	4	0.001	0.009	0.107	0.855	0.018	0	0.009
157	TGC2_052	Netherlands	Indeterminate	4	0	0	0	0.84	0.035	0	0.125
158	TGC1_015	China	Determinate	4	0.07	0.065	0	0.791	0.074	0	0
159	TGC2_141	Korea	Indeterminate	4	0	0	0	0.758	0.058	0	0.184
160	TGC1_024	Unknown	Determinate	4	0	0	0.098	0.737	0	0.139	0.026
161	TGC2_103	Korea	Indeterminate	4	0	0	0	0.687	0.235	0	0.078
162	TGC2_148	Korea	Indeterminate	4	0.205	0.028	0	0.651	0	0.067	0.05
163	TGC1_014	China	Semi-determinate	4	0.045	0.058	0	0.644	0.173	0	0.079
164	TGC1_023	Unknown	Determinate	4	0.001	0.16	0	0.618	0.202	0	0.02
165	TGC2_134	Korea	Indeterminate	4	0	0	0	0.609	0.278	0.038	0.074
166	TGC2_117	Korea	Indeterminate	4	0	0	0	0.603	0	0	0.397
167	TGC2_114	Korea	Indeterminate	4	0	0	0.033	0.601	0.114	0.136	0.117
168	TGC1_084	Unknown	Determinate	4	0	0.247	0	0.599	0.154	0	0
169	TGC2_180	Korea	Indeterminate	4	0.001	0	0	0.576	0.385	0	0.038
170	TGC2_127	Korea	Indeterminate	4	0	0	0	0.567	0.433	0	0
171	TGC1_011	Israel	Semi-determinate	4	0	0.1	0.125	0.555	0.128	0	0.092
172	TGC2_135	Korea	Indeterminate	4	0	0	0	0.551	0.446	0	0.003
173	TGC2_133	Korea	Indeterminate	4	0	0	0	0.547	0.372	0.03	0.051
174	TGC2_139	Korea	Indeterminate	4	0	0.058	0	0.541	0.18	0.04	0.182
175	TGC2_099	Korea	Indeterminate	4	0	0	0	0.54	0.46	0	0
176	TGC1_017	Taiwan	Determinate	4	0	0.24	0	0.537	0	0.146	0.077
177	TGC2_126	Korea	Indeterminate	4	0	0	0	0.536	0.464	0	0
178	TGC1_013	Israel	Determinate	4	0	0.124	0.095	0.533	0.185	0	0.062
179	TGC1_012	Israel	Determinate	4	0	0.107	0.192	0.525	0.132	0	0.045
180	TGC2_182	Korea	Indeterminate	4	0.091	0.247	0	0.521	0	0.14	0.001
181	TGC1_010	Israel	Semi-determinate	4	0	0.178	0.115	0.509	0.163	0	0.035
182	TGC2_140	Korea	Indeterminate	4	0	0	0	0.507	0.245	0.126	0.122
183	TGC2_129	Korea	Indeterminate	4	0	0.012	0	0.504	0.343	0	0.14
184	TGC2_132	Korea	Indeterminate	4	0	0.076	0	0.478	0.302	0.143	0.001
185	TGC2_181	Korea	Indeterminate	4	0	0	0	0.453	0.359	0.17	0.017
186	TGC1_001	Unknown	unknown	4	0.262	0.176	0	0.421	0	0	0.141
187	TGC1_096	India	Determinate	4	0.001	0.004	0.201	0.389	0	0.255	0.15
188	TGC1_095	India	Determinate	4	0.017	0.006	0.199	0.382	0	0.266	0.13
189	TGC2_104	Korea	Indeterminate	4	0.202	0.19	0.002	0.379	0.225	0	0.002
190	TGC1_097	India	Determinate	4	0.012	0.002	0.187	0.37	0	0.289	0.139
191	TGC1_008	Unknown	Determinate	4	0.021	0.147	0.179	0.348	0	0.128	0.178
192	TGC2_145	Korea	Indeterminate	4	0	0	0	0.348	0.191	0.326	0.134
193	TGC2_137	Korea	Indeterminate	4	0.251	0.226	0	0.347	0.172	0	0.004
194	TGC1_007	Unknown	Determinate	4	0.003	0.128	0.201	0.33	0	0.163	0.176
195	TGC2_094	Korea	Indeterminate	5	0.037	0.023	0.165	0.011	0.758	0	0.006
196	TGC1_034	India	Semi-determinate	5	0.11	0.138	0	0	0.752	0	0
197	TGC2_095	Korea	Indeterminate	5	0	0	0	0.367	0.632	0	0.001
198	TGC2_096	Korea	Indeterminate	5	0	0	0	0.376	0.624	0	0
199	TGC2_123	Korea	Indeterminate	5	0	0	0	0.38	0.619	0	0
200	TGC2_098	Korea	Indeterminate	5	0	0	0	0.4	0.6	0	0
201	TGC2_110	Korea	Indeterminate	5	0.157	0	0	0.21	0.595	0	0.038
202	TGC2_179	Korea	Indeterminate	5	0	0	0	0.425	0.575	0	0
203	TGC1_106	India	Determinate	5	0	0.426	0	0	0.574	0	0
204	TGC2_102	Korea	Indeterminate	5	0.13	0	0	0.165	0.574	0	0.131
205	TGC1_142	India	Semi-determinate	5	0	0.429	0	0	0.571	0	0.001
206	TGC2_106	Korea	Indeterminate	5	0.287	0.099	0.004	0	0.569	0.041	0
207	TGC2_097	Korea	Indeterminate	5	0	0	0	0.433	0.567	0	0
208	TGC2_124	Korea	Indeterminate	5	0	0	0	0.457	0.543	0	0
209	TGC1_143	India	Determinate	5	0	0.462	0	0	0.538	0	0
210	TGC1_144	India	Determinate	5	0	0.462	0	0	0.538	0	0
211	TGC1_119	India	Determinate	5	0	0.463	0	0	0.537	0	0
212	TGC2_125	Korea	Indeterminate	5	0	0	0	0.468	0.532	0	0
213	TGC1_150	Israel	Determinate	5	0	0.478	0	0	0.522	0	0
214	TGC2_161	Korea	Indeterminate	5	0	0.136	0.145	0	0.521	0.198	0
215	TGC2_121	Korea	Indeterminate	5	0.058	0.142	0	0.284	0.515	0	0.001
216	TGC2_130	Korea	Indeterminate	5	0	0	0	0.421	0.465	0	0.114
217	TGC1_122	India	Semi-determinate	5	0.027	0.44	0	0.07	0.463	0	0
218	TGC2_128	Korea	Indeterminate	5	0	0.009	0	0.388	0.459	0	0.143
219	TGC1_125	India	Semi-determinate	5	0.045	0.426	0	0.071	0.458	0	0
220	TGC2_101	Korea	Indeterminate	5	0	0	0	0.329	0.451	0.211	0.008
221	TGC1_026	India	Semi-determinate	5	0.278	0.147	0.135	0	0.439	0	0
222	TGC1_059	India	Semi-determinate	5	0.143	0.001	0.42	0	0.435	0	0
223	TGC2_166	Korea	Indeterminate	5	0.124	0	0	0.386	0.434	0	0.056
224	TGC2_100	Korea	Indeterminate	5	0	0.045	0	0.384	0.431	0	0.14
225	TGC2_107	Korea	Indeterminate	5	0	0.168	0.401	0	0.43	0	0.001
226	TGC2_162	Korea	Indeterminate	5	0	0.169	0.401	0	0.429	0	0.001
227	TGC1_128	Taiwan	Determinate	5	0.042	0.093	0.219	0	0.423	0.043	0.179
228	TGC2_108	Korea	Indeterminate	5	0.254	0	0.339	0	0.408	0	0
229	TGC2_163	Korea	Indeterminate	5	0.253	0	0.339	0	0.408	0	0
230	TGC2_105	Korea	Indeterminate	5	0.254	0	0.339	0	0.407	0	0
231	TGC2_164	Korea	Indeterminate	5	0.281	0.021	0.292	0	0.406	0	0
232	TGC1_032	India	Semi-determinate	5	0.283	0.103	0.177	0.022	0.401	0	0.013
233	TGC2_109	Korea	Indeterminate	5	0.248	0	0.351	0	0.401	0	0
234	TGC1_060	India	Determinate	5	0.014	0.221	0.381	0	0.382	0	0.002
235	TGC2_131	Korea	Indeterminate	5	0	0.106	0	0.379	0.38	0.132	0.004
236	TGC2_169	Korea	Indeterminate	5	0.207	0	0.158	0	0.348	0.238	0.049
237	TGC2_171	Korea	Indeterminate	5	0.128	0.081	0.303	0.011	0.339	0.001	0.137
238	TGC2_190	Korea	Indeterminate	5	0.191	0	0.183	0	0.337	0.229	0.06
239	TGC1_149	Taiwan	Determinate	5	0.153	0.109	0.273	0.023	0.322	0	0.121
240	TGC2_191	Korea	Indeterminate	5	0.234	0	0.214	0	0.308	0.202	0.042
241	TGC2_142	Korea	Indeterminate	5	0	0.044	0.046	0.213	0.258	0.196	0.243
242	TGC2_005	US	Indeterminate	6	0	0	0	0	0	1	0
243	TGC2_006	US	Indeterminate	6	0	0	0	0	0	1	0
244	TGC2_007	US	Indeterminate	6	0	0	0	0	0	1	0
245	TGC2_009	US	Indeterminate	6	0	0	0	0	0	1	0
246	TGC2_011	US	Indeterminate	6	0	0	0	0	0	1	0
247	TGC2_012	US	Indeterminate	6	0	0	0	0	0	1	0
248	TGC2_014	US	Indeterminate	6	0	0	0	0	0	1	0
249	TGC2_017	Peru	Indeterminate	6	0	0	0	0	0	1	0
250	TGC2_020	Chile	Indeterminate	6	0	0	0	0	0	1	0
251	TGC2_027	Peru	Indeterminate	6	0	0	0	0	0	1	0
252	TGC2_031	Mexico	Indeterminate	6	0	0	0	0	0	1	0
253	TGC2_034	US	Indeterminate	6	0	0	0	0	0	1	0
254	TGC2_041	Japan	Indeterminate	6	0	0	0	0	0	1	0
255	TGC2_042	Russia	Indeterminate	6	0	0	0	0	0	1	0
256	TGC2_043	Russia	Indeterminate	6	0	0	0	0	0	1	0
257	TGC2_046	Russia	Indeterminate	6	0	0	0	0	0	1	0
258	TGC2_047	Russia	Indeterminate	6	0	0	0	0	0	1	0
259	TGC2_051	Russia	Indeterminate	6	0	0	0	0	0	1	0
260	TGC2_053	Russia	Indeterminate	6	0	0	0	0	0	1	0
261	TGC2_055	Russia	Indeterminate	6	0	0	0	0	0	1	0
262	TGC2_057	Uzbekistan	Indeterminate	6	0	0	0	0	0	1	0
263	TGC2_060	Russia	Indeterminate	6	0	0	0	0	0	1	0
264	TGC2_061	Russia	Indeterminate	6	0	0	0	0	0	1	0
265	TGC2_062	Italy	Indeterminate	6	0	0	0	0	0	1	0
266	TGC2_063	Uzbekistan	Indeterminate	6	0	0	0	0	0	1	0
267	TGC2_066	China	Indeterminate	6	0	0	0	0	0	1	0
268	TGC2_067	Uzbekistan	Indeterminate	6	0	0	0	0	0	1	0
269	TGC2_069	Uzbekistan	Indeterminate	6	0	0	0	0	0	1	0
270	TGC2_070	Uzbekistan	Indeterminate	6	0	0	0	0	0	1	0
271	TGC2_084	Russia	Indeterminate	6	0	0	0	0	0	1	0
272	TGC2_085	Russia	Indeterminate	6	0	0	0	0	0	1	0
273	TGC2_087	Russia	Indeterminate	6	0	0	0	0	0	1	0
274	TGC2_091	Russia	Indeterminate	6	0	0	0	0	0	1	0
275	TGC2_093	Russia	Indeterminate	6	0	0	0	0	0	1	0
276	TGC2_150	Korea	Indeterminate	6	0	0	0	0	0	1	0
277	TGC2_151	Korea	Indeterminate	6	0	0	0	0	0	1	0
278	TGC2_153	Korea	Indeterminate	6	0	0	0	0	0	1	0
279	TGC2_154	Korea	Indeterminate	6	0	0	0	0	0	1	0
280	TGC2_155	Korea	Indeterminate	6	0	0	0	0	0	1	0
281	TGC2_158	Korea	Indeterminate	6	0	0	0	0	0	1	0
282	TGC2_159	Korea	Indeterminate	6	0	0	0	0	0	1	0
283	TGC2_004	US	Indeterminate	6	0	0	0	0	0	0.999	0
284	TGC2_008	US	Indeterminate	6	0	0	0	0	0	0.999	0
285	TGC2_056	Israel	Indeterminate	6	0	0	0	0	0	0.999	0
286	TGC2_050	Russia	Indeterminate	6	0.003	0	0	0	0	0.996	0.001
287	TGC2_157	Korea	Indeterminate	6	0	0	0.003	0	0	0.996	0
288	TGC2_044	Russia	Indeterminate	6	0	0	0.015	0	0	0.985	0
289	TGC2_016	US	Indeterminate	6	0	0	0	0.015	0	0.983	0.001
290	TGC2_030	Guatemala	Indeterminate	6	0	0	0	0.017	0	0.982	0
291	TGC2_029	Mexico	Indeterminate	6	0	0.018	0	0	0	0.979	0.003
292	TGC2_076	Uzbekistan	Indeterminate	6	0.007	0.005	0	0.006	0.002	0.977	0.003
293	TGC1_101	India	Semi-determinate	6	0.014	0.009	0	0	0	0.976	0
294	TGC1_145	India	Semi-determinate	6	0	0.025	0	0	0	0.975	0
295	TGC2_038	US	Indeterminate	6	0	0	0	0	0	0.97	0.03
296	TGC2_090	Russia	Indeterminate	6	0.047	0	0	0	0	0.953	0
297	TGC2_092	Russia	Indeterminate	6	0.047	0	0	0	0	0.953	0
298	TGC2_058	Italy	Indeterminate	6	0	0.048	0	0	0	0.951	0
299	TGC2_089	Russia	Indeterminate	6	0	0.053	0	0	0	0.947	0
300	TGC1_102	India	Semi-determinate	6	0.012	0.038	0	0.003	0	0.946	0.001
301	TGC2_064	Russia	Indeterminate	6	0	0.054	0	0	0	0.946	0
302	TGC2_049	Russia	Indeterminate	6	0	0.006	0.052	0	0	0.942	0
303	TGC2_088	Russia	Indeterminate	6	0	0	0	0	0	0.941	0.059
304	TGC2_010	US	Indeterminate	6	0	0.01	0.069	0	0	0.921	0
305	TGC2_156	Korea	Indeterminate	6	0	0	0.08	0	0	0.92	0
306	TGC2_024	Panama	Indeterminate	6	0.009	0.014	0.033	0.029	0	0.914	0
307	TGC2_065	Russia	Indeterminate	6	0.001	0.09	0	0	0	0.909	0
308	TGC2_026	Peru	Indeterminate	6	0.001	0	0.04	0.054	0	0.903	0.001
309	TGC2_023	Colombia	Indeterminate	6	0.026	0	0.054	0.033	0	0.886	0
310	TGC2_073	Uzbekistan	Indeterminate	6	0	0.119	0	0	0	0.88	0
311	TGC2_033	US	Indeterminate	6	0.014	0.001	0.02	0.035	0.033	0.868	0.028
312	TGC2_019	Bolivia	Indeterminate	6	0	0.028	0	0.129	0	0.817	0.026
313	TGC2_035	US	Indeterminate	6	0.02	0.037	0.018	0.071	0	0.804	0.049
314	TGC2_013	US	Indeterminate	6	0	0	0	0.201	0	0.799	0
315	TGC2_025	Ecuador	Indeterminate	6	0.013	0.098	0.021	0.06	0	0.773	0.035
316	TGC2_028	Nicaragua	Indeterminate	6	0.023	0	0.058	0.132	0.003	0.773	0.01
317	TGC2_040	US	Indeterminate	6	0	0	0.049	0.087	0	0.768	0.095
318	TGC2_071	Uzbekistan	Indeterminate	6	0.001	0	0.278	0	0	0.721	0
319	TGC2_018	Chile	Indeterminate	6	0	0.306	0	0	0	0.694	0
320	TGC2_037	US	Indeterminate	6	0	0	0	0	0.242	0.673	0.085
321	TGC2_152	Korea	Indeterminate	6	0	0	0	0.069	0.163	0.644	0.124
322	TGC2_054	Russia	Indeterminate	6	0	0.121	0.058	0	0	0.63	0.19
323	TGC2_003	US	Indeterminate	6	0.12	0	0	0.152	0.099	0.629	0
324	TGC1_021	Unknown	Determinate	6	0	0.237	0.064	0	0.048	0.615	0.036
325	TGC1_002	China	Semi-determinate	6	0.31	0	0.063	0.001	0.027	0.587	0.012
326	TGC2_068	Chile	Indeterminate	6	0	0.134	0.306	0	0	0.559	0
327	TGC2_077	Uzbekistan	Indeterminate	6	0.053	0.001	0.456	0	0.011	0.479	0
328	TGC2_188	Korea	Indeterminate	6	0	0.016	0.271	0.118	0	0.479	0.116
329	TGC2_022	Ecuador	Indeterminate	6	0	0	0.164	0.252	0.11	0.474	0
330	TGC1_009	Unknown	Semi-determinate	6	0.004	0.077	0.063	0.252	0	0.451	0.153
331	TGC1_016	Taiwan	Semi-determinate	6	0.001	0.249	0	0.309	0	0.442	0
332	TGC1_022	Unknown	Determinate	6	0	0.049	0.18	0.167	0	0.441	0.162
333	TGC2_021	Ecuador	Indeterminate	6	0	0	0.176	0.264	0.134	0.422	0.003
334	TGC2_002	US	Indeterminate	6	0.164	0	0.256	0	0.163	0.416	0
335	TGC2_112	Korea	Indeterminate	6	0.35	0	0.242	0	0	0.407	0.001
336	TGC1_048	Unknown	Determinate	6	0.04	0.092	0.317	0.171	0	0.372	0.008
337	TGC2_173	Korea	Indeterminate	6	0.245	0	0.325	0	0.077	0.354	0
338	TGC1_020	Unknown	Determinate	6	0	0.274	0	0.312	0	0.351	0.064
339	TGC1_003	Unknown	Determinate	6	0.051	0.259	0	0.239	0	0.349	0.102
340	TGC2_174	Korea	Indeterminate	6	0.255	0	0.314	0	0.082	0.348	0
341	TGC2_175	Korea	Indeterminate	6	0.317	0	0.137	0	0.114	0.348	0.083
342	TGC2_172	Korea	Indeterminate	6	0.285	0	0.124	0	0.184	0.333	0.075
343	TGC2_170	Korea	Indeterminate	6	0.165	0	0.126	0	0.213	0.297	0.2
344	TGC2_119	Korea	Indeterminate	7	0	0	0	0	0	0	1
345	TGC2_184	Korea	Indeterminate	7	0	0	0	0	0	0	1
346	TGC2_138	Korea	Indeterminate	7	0	0	0	0	0	0	1
347	TGC2_183	Korea	Indeterminate	7	0	0	0	0	0	0	1
348	TGC2_184	Korea	Indeterminate	7	0	0	0	0	0	0	1
349	TGC2_185	Korea	Indeterminate	7	0	0	0	0	0	0	1
350	TGC2_186	Korea	Indeterminate	7	0	0	0	0	0	0	1
351	TGC2_187	Korea	Indeterminate	7	0	0	0.052	0	0	0	0.948
352	TGC2_118	Korea	Indeterminate	7	0	0	0	0.313	0.139	0.084	0.464
353	TGC2_143	Korea	Indeterminate	7	0.055	0.024	0.165	0.273	0.148	0	0.336
aThe best K was determined using the delta K method (Evanno et al., 2005)

## Sheet: Table S2
Table S2. The 63 SNPs associated with bacterial wilt resistance at P < 0.005 in the combined population (n=353).
SNP	Chromosome	Positiona (Mb)	P-value
SLA770510	1	1.25322	0.00275411
SLA789959	1	72.5132	0.000774268
SLA800025	1	72.5286	0.0013659
SLA771891	1	72.5382	0.00129967
SLA787766	1	72.5393	0.000796899
SLA811644	1	72.5408	0.000793478
SLA777730	1	72.5701	0.00425976
SLA774995	1	72.5915	0.00173722
SLA783458	1	72.6021	0.00214272
SLA803432	1	72.6156	0.00299871
SLA786885	1	72.6396	0.00275779
SLA781853	1	72.6483	0.00218105
SLA780046	1	72.654	0.00209749
SLA811257	1	72.6552	0.00403734
SLA777225	1	72.6567	0.00462812
SLA807498	1	72.657	0.00472219
SLA771596	1	72.6576	0.00385938
SLA811841	1	72.6598	0.00385938
SLA776003	1	72.6607	0.00385938
SLA778072	1	72.661	0.00462812
SLA814798	1	72.6625	0.00374391
SLA800812	1	72.6961	0.00330397
SLA774614	1	72.6966	0.00330397
SLA777655	1	72.697	0.00244222
SLA779967	1	72.6971	0.00244222
SLA792691	2	19.7745	0.00348169
SLA800208	2	43.8853	0.00299208
SLA809406	2	45.1218	0.00275953
SLA782701	4	63.3199	0.00103147
SLA787888	6	20.2225	0.00146252
SLA810653	6	22.7175	0.00254175
SLA784058	6	27.7167	0.00450176
SLA812498	6	27.7434	0.0038294
SLA799164	6	27.7496	0.00126204
SLA774971	6	38.7008	0.0036426
SLA782764	6	39.774	0.000720682
SLA784722	6	39.7866	0.000782801
SLA782720	6	41.3774	0.00393272
SLA817960	6	41.3774	0.00254175
SLA806713	7	3.88284	0.00224966
SLA813377	7	57.3448	0.00348525
SLA769317	7	60.1886	0.00410048
SLA784014	8	61.1392	0.00395
SLA788604	8	62.999	0.00491049
SLA791162	8	63.0242	0.00491049
SLA815418	9	0.353494	0.00334982
SLA773985	9	0.355356	0.00129633
SLA785194	9	66.9604	0.00118526
SLA782687	9	67.3259	0.001966
SLA811798	9	67.567	0.000173729
SLA789039	9	67.6346	0.000743575
SLA809729	9	67.6552	0.000985346
SLA781861	11	51.9694	0.00209121
SLA790457	12	2.90594	3.56534e-09
SLA768776	12	3.96367	0.00470403
SLA783295	12	3.96747	0.00200009
SLA797654	12	3.96888	0.0031724
SLA810649	12	3.9779	0.000656765
SLA805942	12	3.9779	0.0019862
SLA791324	12	3.97809	0.00195364
SLA798587	12	3.9781	0.00195364
SLA808449	12	3.97815	0.00195364
SLA786226	12	8.2097	0.00273747
aThe physical map positions were determined using the tomato genome assembly SL4.0

## Sheet: Table S3
Table S3. The marker effects, variable importance values, and P-values of 3,529 SNPs in the subsets 1, 2, and 3.
SNP	Chromosome	Positiona (Mb)	Marker effectb	VIMc	P-valued
SLA808899	1	0.136933	0.000202421	10.4806	0.251375
SLA811479	1	0.143485	0.000211422	6.37418	0.0746489
SLA790922	1	0.147807	0.000176497	4.77116	0.135269
SLA802921	1	0.156847	0.000106604	4.64392	0.234307
SLA795395	1	0.215549	0.000271844	13.9033	0.0189727
SLA776315	1	0.256026	0.000171793	5.21343	0.532861
SLA805742	1	0.270754	0.000124982	9.50237	0.0152219
SLA788261	1	0.28822	0.000182783	1.65374	0.01351
SLA812649	1	0.295876	0.00012245	5.35913	0.531541
SLA787175	1	0.322165	7.83064e-05	5.17018	0.642634
SLA775442	1	0.375476	0.000163638	6.89408	0.118767
SLA815897	1	0.385949	7.65533e-05	5.41562	0.222125
SLA786307	1	0.406384	0.000137216	4.94347	0.144102
SLA770393	1	0.413637	1.29298e-05	9.74536	0.364347
SLA812265	1	0.419033	7.82994e-06	7.1225	0.700165
SLA803397	1	0.420204	0.000400149	3.15441	0.090429
SLA788071	1	0.427927	1.23322e-05	6.50262	0.708555
SLA808281	1	0.43328	3.91489e-05	4.91957	0.708555
SLA767764	1	0.43826	0.000182281	9.89831	0.0108378
SLA808322	1	0.44144	0.000114363	6.5436	0.30058
SLA804074	1	0.467654	0.000286726	16.8088	0.0449306
SLA812908	1	0.473966	0.000338412	3.38235	0.159616
SLA791641	1	0.474072	0.000113013	8.95921	0.0818418
SLA804099	1	0.484935	0.000275742	1.59507	0.767369
SLA789898	1	0.485106	6.72964e-05	5.31807	0.518826
SLA779081	1	0.491793	0.000126132	5.72373	0.318313
SLA811280	1	0.491796	0.000210364	11.9779	0.044638
SLA779998	1	0.492024	0.000116735	6.50227	0.138247
SLA795133	1	0.49638	0.000103526	4.49648	0.0716007
SLA788061	1	0.501305	0.000167841	11.6898	0.113746
SLA812073	1	0.507848	0.000234594	15.9463	0.147404
SLA806388	1	0.517008	0.000206949	10.0595	0.267745
SLA817975	1	0.527383	0.000137722	8.96383	0.025696
SLA817883	1	0.528114	0.000170437	4.9208	0.0358603
SLA814359	1	0.585442	9.97041e-05	-14.4074	0.0236773
SLA774415	1	0.610659	0.000302568	3.26983	0.0587468
SLA769656	1	0.72424	0.000103226	4.50825	0.994211
SLA802753	1	0.729138	2.81816e-05	4.78129	0.103846
SLA806486	1	0.753004	5.79394e-05	6.93324	0.461453
SLA787361	1	0.757714	0.000324717	1.96111	0.131579
SLA777547	1	1.01048	2.06637e-05	5.76187	0.913942
SLA813458	1	1.03581	0.000172342	6.84779	0.280097
SLA801642	1	1.03806	0.000281613	0.711642	0.100272
SLA803620	1	1.05068	0.00029507	4.81807	0.0906908
SLA810702	1	1.06499	0.0001797	5.5326	0.343231
SLA778285	1	1.06772	0.000217277	4.74479	0.263811
SLA774226	1	1.06888	0.000195991	6.14391	0.465699
SLA800873	1	1.06893	0.00027968	2.56182	0.163825
SLA807741	1	1.0709	0.000312368	1.81641	0.0676468
SLA806208	1	1.08858	0.000188883	14.1966	0.0918774
SLA814703	1	1.08903	0.000175252	10.9982	0.192552
SLA808472	1	1.09308	0.000176091	13.0983	0.136535
SLA801663	1	1.09587	0.000221909	4.45086	0.266296
SLA782266	1	1.10105	0.000132476	20.4196	0.131769
SLA794067	1	1.10107	0.000103953	25.3296	0.166492
SLA808882	1	1.11485	0.000247733	19.8442	0.113955
SLA803098	1	1.11535	0.000365135	5.2746	0.0186791
SLA817743	1	1.11591	0.000291115	3.48207	0.10753
SLA803214	1	1.11635	6.81062e-05	10.019	0.395716
SLA803499	1	1.11675	0.000244059	21.0299	0.119965
SLA813833	1	1.12703	0.000464767	2.90168	0.00506481
SLA777558	1	1.15726	7.64808e-05	5.48902	0.974684
SLA773822	1	1.17407	0.000191638	9.96529	0.155823
SLA809552	1	1.17414	0.000174372	6.74781	0.159466
SLA781128	1	1.17625	0.000188733	10.9236	0.111027
SLA787666	1	1.17876	0.00023375	19.1818	0.0460857
SLA816952	1	1.18133	0.000275903	15.6163	0.0550964
SLA770510	1	1.25322	0.000508109	3.67491	0.00275411
SLA777996	1	1.3261	0.000177455	6.82855	0.205952
SLA793489	1	1.33039	0.000237048	4.78687	0.174935
SLA802703	1	1.33049	0.000183756	4.79427	0.113652
SLA787626	1	1.33136	0.000177308	5.23147	0.227483
SLA778653	1	1.36996	0.000205729	11.3798	0.0346552
SLA802900	1	1.38801	9.54226e-05	4.71398	0.851596
SLA783842	1	1.46508	7.67232e-05	5.62923	0.994097
SLA801030	1	1.47086	0.000108717	7.1318	0.821553
SLA815260	1	1.47314	6.1403e-05	6.20315	0.649014
SLA800153	1	1.47903	0.000213532	6.686	0.0774033
SLA768492	1	1.48596	7.1826e-05	5.30156	0.590909
SLA788079	1	1.48878	0.000180462	9.75095	0.281494
SLA781934	1	1.48951	0.000206687	35.8461	0.0761771
SLA796818	1	1.51948	0.000269462	19.9556	0.038885
SLA815727	1	1.53523	0.000195706	23.7426	0.0547216
SLA809027	1	1.55072	0.000223596	23.6794	0.0547216
SLA793294	1	1.57582	0.000273618	1.75115	0.0589214
SLA811446	1	1.58882	0.000341303	0.851708	0.0944629
SLA790113	1	1.5933	0.000272823	1.14859	0.204336
SLA782017	1	1.61501	0.000195804	8.1105	0.133629
SLA800521	1	1.7995	0.000410232	9.17752	0.0460141
SLA805450	1	1.8117	0.000443849	20.3611	0.0182178
SLA771060	1	1.81541	0.000419746	19.1298	0.0264231
SLA786429	1	1.82008	0.000151209	5.24085	0.542566
SLA793600	1	1.82756	3.03303e-05	5.7877	0.893145
SLA807355	1	1.93943	0.000258848	10.8905	0.169744
SLA801886	1	1.95418	0.00021192	5.08681	0.148807
SLA773270	1	1.9558	0.000153766	6.8346	0.652076
SLA792434	1	1.96254	0.000182593	5.742	0.258385
SLA786689	1	1.97143	0.000237882	7.96638	0.1277
SLA774929	1	2.02928	0.000158159	3.09551	0.0272288
SLA795550	1	2.09383	3.74347e-05	8.55639	0.761119
SLA796438	1	2.1594	0.000143046	5.02309	0.134024
SLA797796	1	2.43121	0.000100465	5.32513	0.682409
SLA813050	1	2.47894	0.000138576	4.84292	0.0627631
SLA783889	1	2.53812	0.000253196	3.80528	0.0273748
SLA799926	1	2.53834	0.000333264	3.33714	0.0233344
SLA807882	1	2.54888	0.000273631	2.10576	0.207321
SLA772962	1	2.54932	0.000207591	-0.266044	0.0354848
SLA804946	1	2.55111	0.000196611	2.0763	0.0354848
SLA807971	1	2.55298	0.00014186	-0.499378	0.0481125
SLA801813	1	2.57104	0.000255459	2.17098	0.0354848
SLA769135	1	2.57114	0.000289635	2.22077	0.0202039
SLA818104	1	2.57414	0.000232432	2.98416	0.0468793
SLA800462	1	2.57447	0.000294314	1.75325	0.0251339
SLA809317	1	2.57489	0.000233843	-0.697052	0.0253871
SLA788455	1	2.57557	0.000209929	2.88367	0.0358004
SLA773333	1	2.57682	0.000204834	1.37279	0.0370351
SLA806530	1	2.57928	0.00028618	2.01875	0.0260471
SLA790851	1	2.57975	0.000280177	3.83912	0.221215
SLA783683	1	2.58036	0.000234363	3.15657	0.0373609
SLA806155	1	2.58122	0.000201672	1.27085	0.0230919
SLA797941	1	2.58327	0.000243585	1.98664	0.0376137
SLA799743	1	3.00115	0.000283699	4.45293	0.314973
SLA782940	1	3.03843	0.000203475	5.44393	0.0354322
SLA802238	1	3.08059	0.000113413	7.16659	0.027224
SLA772839	1	3.14378	7.01673e-05	9.05249	0.0131549
SLA810592	1	3.29102	0.00023104	9.37461	0.141318
SLA817237	1	3.54038	0.000325033	8.29932	0.051017
SLA794753	1	3.54967	0.000222565	5.33318	0.0534644
SLA781522	1	3.61673	0.000295956	7.2751	0.0174217
SLA793446	1	3.85216	0.000197521	5.42225	0.0745911
SLA771236	1	4.94068	0.00011399	6.04143	0.376342
SLA772123	1	5.25138	9.18848e-05	4.47191	0.940724
SLA795900	1	5.25947	0.00028229	-1.1781	0.42558
SLA786207	1	5.34699	3.01613e-05	5.73287	0.556884
SLA813882	1	5.37292	1.68632e-05	4.87015	0.772403
SLA788775	1	5.46592	0.000336695	2.41858	0.118346
SLA776792	1	5.4679	0.000360656	2.38888	0.0769675
SLA786478	1	5.54498	0.000370705	1.40232	0.0969557
SLA775648	1	5.59152	0.000170598	9.99839	0.0899897
SLA769534	1	5.64959	1.6203e-05	11.2891	0.657774
SLA774321	1	6.06482	0.000307536	1.89539	0.211671
SLA797154	1	6.08697	0.000284162	2.46921	0.21369
SLA811287	1	9.73838	0.00030205	5.8971	0.168977
SLA799384	1	10.2729	0.000335661	3.02719	0.0794085
SLA783277	1	10.5461	0.000344828	3.44393	0.0801487
SLA811585	1	10.5618	0.000430426	2.81929	0.101579
SLA775317	1	10.5626	4.49245e-05	4.5616	0.919892
SLA791228	1	10.6776	0.000335186	1.26888	0.192375
SLA767604	1	10.6966	0.000337054	9.30123	0.0147692
SLA791853	1	10.7382	0.000267588	1.04223	0.165223
SLA807048	1	10.767	0.000396395	5.08278	0.109456
SLA794885	1	10.7671	0.000351149	5.94412	0.0899124
SLA812107	1	10.778	0.000216826	4.62373	0.49144
SLA768038	1	10.8114	0.000290137	2.40495	0.170085
SLA800422	1	10.8327	0.000199829	4.8769	0.511153
SLA786577	1	10.9505	0.000393291	3.30207	0.071092
SLA773005	1	10.9691	0.000315686	1.125	0.141819
SLA779451	1	10.9949	0.000348086	2.81536	0.125625
SLA777820	1	11.0111	0.000338153	4.10468	0.177435
SLA779406	1	11.015	0.000187848	7.27375	0.520318
SLA813865	1	11.0206	0.000335535	1.1983	0.12913
SLA769012	1	11.0821	0.000117438	9.75879	0.760623
SLA790450	1	11.1306	0.000371146	1.45011	0.155041
SLA790878	1	11.1372	0.0003941	2.65576	0.121981
SLA779682	1	11.7451	0.000304062	5.4207	0.0339483
SLA812284	1	12.3718	0.000342417	7.2102	0.211959
SLA814856	1	17.7976	0.000386419	2.74503	0.101007
SLA808177	1	17.8005	0.000328542	2.47449	0.14643
SLA813608	1	17.8261	0.000357586	5.26363	0.125003
SLA807089	1	21.1941	0.000319947	7.39011	0.217359
SLA782500	1	22.7477	0.000259928	5.39013	0.0339474
SLA778456	1	23.5981	0.000351826	6.1744	0.024383
SLA768166	1	23.9481	0.000175491	6.27824	0.489605
SLA805383	1	24.1316	7.77782e-05	4.72148	0.159894
SLA808622	1	35.6267	0.000326703	6.83164	0.0640406
SLA814563	1	35.651	0.000314618	10.7705	0.190251
SLA785484	1	42.7749	0.000279328	0.0326424	0.251237
SLA781355	1	47.126	0.000255128	5.8921	0.232915
SLA778510	1	47.4833	0.00013962	5.81619	0.105044
SLA785401	1	49.8889	0.000253029	5.49811	0.0385801
SLA791953	1	58.4597	3.02094e-05	-0.614872	0.0134895
SLA776526	1	63.6871	0.000171594	12.096	0.210926
SLA778983	1	68.0867	0.000189139	0.976158	0.0270206
SLA785286	1	68.5081	0.000116304	4.65099	0.747372
SLA805589	1	68.743	5.19571e-05	6.84554	0.734284
SLA798846	1	68.7841	6.19029e-06	5.33271	0.571273
SLA805418	1	68.9013	1.83825e-05	5.26453	0.484334
SLA815716	1	69.0797	6.31753e-06	6.64035	0.899948
SLA770256	1	69.3169	3.3924e-05	5.92976	0.551411
SLA783841	1	69.6371	0.000108726	6.65436	0.244317
SLA799399	1	69.6435	6.75956e-05	4.87319	0.383587
SLA796509	1	69.6473	7.9604e-05	4.54454	0.359774
SLA782895	1	69.6485	6.22181e-05	4.85292	0.264723
SLA810529	1	69.6562	8.91438e-05	7.18162	0.380004
SLA792239	1	69.658	8.46569e-05	5.87119	0.319167
SLA776853	1	69.6661	3.28275e-05	7.67528	0.302629
SLA802689	1	69.6687	0.000155234	4.88699	0.319167
SLA783860	1	69.6717	1.94893e-05	5.51019	0.554807
SLA797160	1	69.6784	0.000108693	13.4254	0.163899
SLA808986	1	69.6797	8.40004e-05	4.50231	0.251576
SLA802853	1	69.7022	1.44417e-05	5.22326	0.592256
SLA775623	1	69.7688	0.000133749	7.76229	0.381883
SLA785031	1	69.7718	1.39065e-05	7.14621	0.521572
SLA783349	1	69.7724	1.88366e-05	7.79006	0.617034
SLA807377	1	70.3389	0.000205341	5.11938	0.067414
SLA779590	1	70.3847	0.000237084	2.81527	0.0458993
SLA790163	1	71.0563	4.33178e-06	4.6194	0.49484
SLA799186	1	71.3904	6.94094e-05	7.08239	0.146169
SLA774450	1	71.5337	4.98029e-05	5.60567	0.378523
SLA803709	1	71.5356	5.71792e-05	9.5143	0.533372
SLA775768	1	72.2606	0.000272021	1.03232	0.0804524
SLA805668	1	72.2608	0.000279359	1.59296	0.0672883
SLA790744	1	72.2623	0.00027301	0.698834	0.0611225
SLA773995	1	72.2651	0.000300674	-0.397347	0.0730682
SLA803984	1	72.2658	0.00027938	0.169504	0.0847169
SLA808249	1	72.2659	0.00029602	1.54977	0.0787559
SLA777835	1	72.2687	0.000268947	2.79415	0.0615446
SLA785248	1	72.2719	0.000304137	0.992703	0.0635297
SLA796929	1	72.2723	0.000335913	1.34722	0.0591306
SLA806226	1	72.2749	0.000303676	-0.866475	0.0591306
SLA795596	1	72.275	0.000276336	0.993349	0.0548718
SLA783603	1	72.2893	0.000277289	3.46219	0.0209124
SLA813729	1	72.2985	0.000270973	1.90808	0.0448793
SLA789959	1	72.5132	0.000496861	0.353877	0.000774268
SLA800025	1	72.5286	0.000471711	2.63529	0.0013659
SLA771891	1	72.5382	0.000503161	1.67414	0.00129967
SLA787766	1	72.5393	0.000475572	3.96623	0.000796899
SLA811644	1	72.5408	0.000483038	3.73071	0.000793478
SLA777730	1	72.5701	0.000382075	0.941556	0.00425976
SLA774995	1	72.5915	0.000412462	0.66028	0.00173722
SLA783458	1	72.6021	0.000450156	0.416363	0.00214272
SLA803432	1	72.6156	0.000422358	-0.387268	0.00299871
SLA786885	1	72.6396	0.00043488	2.33134	0.00275779
SLA781853	1	72.6483	0.000410017	-0.626874	0.00218105
SLA788212	1	72.6491	0.000308461	2.15112	0.00574009
SLA780046	1	72.654	0.000464485	1.38485	0.00209749
SLA808740	1	72.6552	0.000357167	0.998731	0.00576046
SLA811257	1	72.6552	0.000403897	-0.796657	0.00403734
SLA777225	1	72.6567	0.000321406	0.0534437	0.00462812
SLA807498	1	72.657	0.000391146	1.50166	0.00472219
SLA771596	1	72.6576	0.000387702	2.44174	0.00385938
SLA795440	1	72.6582	0.00031701	1.44907	0.00504914
SLA811841	1	72.6598	0.000381138	1.78768	0.00385938
SLA777653	1	72.66	0.000406429	1.89198	0.0050691
SLA776003	1	72.6607	0.000374128	2.33999	0.00385938
SLA803942	1	72.6609	0.000321763	-0.291144	0.0050691
SLA777834	1	72.6609	0.000388796	1.88078	0.00539577
SLA778072	1	72.661	0.000347821	0.76204	0.00462812
SLA805394	1	72.6612	0.000246811	3.88683	0.00707367
SLA771763	1	72.6625	0.00035129	1.39061	0.00808664
SLA814798	1	72.6625	0.00040531	2.7761	0.00374391
SLA800812	1	72.6961	0.000361925	0.0592153	0.00330397
SLA774614	1	72.6966	0.000384984	1.33234	0.00330397
SLA777655	1	72.697	0.000404933	2.40438	0.00244222
SLA779967	1	72.6971	0.000386734	2.36803	0.00244222
SLA780913	1	73.009	0.000152724	1.41017	0.0478619
SLA791539	1	73.1263	0.000165578	1.75722	0.0275515
SLA809510	1	73.1392	0.000143702	1.78003	0.0495268
SLA802472	1	73.1705	0.000192382	2.62326	0.0477433
SLA781183	1	73.1819	0.000191095	3.61209	0.0110171
SLA804713	1	73.489	0.000309964	2.70785	0.0655868
SLA812588	1	74.2423	0.000273629	2.02113	0.251161
SLA812681	1	74.2705	0.000214524	5.02664	0.272623
SLA792976	1	74.3072	0.00028626	0.856562	0.311964
SLA775128	1	74.38	0.000151196	4.48432	0.59179
SLA789009	1	74.4682	3.7965e-05	2.13535	0.0409989
SLA811140	1	75.1936	0.000106441	4.51336	0.613723
SLA813041	1	75.1958	8.73418e-05	5.09037	0.440981
SLA768415	1	75.1959	8.91632e-05	4.62001	0.95752
SLA790142	1	75.1975	7.7455e-06	4.49483	0.661725
SLA794254	1	75.5592	0.000151574	7.22257	0.194345
SLA778475	1	76.1632	4.20783e-05	4.62763	0.101172
SLA784021	1	76.5166	0.000210376	3.53374	0.0280874
SLA767619	1	76.5246	0.000207105	3.89819	0.0235075
SLA796735	1	76.5251	0.000138391	2.55327	0.0396816
SLA781181	1	76.8609	0.000120081	1.2197	0.0332884
SLA776832	1	77.4115	0.000357022	3.55834	0.0751209
SLA797573	1	77.5956	0.000107205	5.113	0.145603
SLA787151	1	77.8623	1.15792e-05	5.58166	0.342806
SLA776404	1	77.916	2.90267e-05	4.41032	0.704939
SLA796905	1	78.1549	0.000390616	2.45625	0.0344
SLA768997	1	78.1818	1.45697e-05	1.34212	0.0343396
SLA767983	1	78.1966	0.000389583	2.46014	0.0448582
SLA797020	1	78.2034	0.000375744	2.00075	0.0273073
SLA783559	1	78.2181	0.000376285	3.42202	0.0220569
SLA786673	1	78.2307	0.000328973	2.88362	0.0336065
SLA810282	1	78.2449	0.000299767	2.0451	0.0814761
SLA812976	1	78.2866	0.000401196	0.238316	0.0581318
SLA808604	1	78.3023	0.000407759	3.3684	0.0495869
SLA812458	1	78.31	0.000292474	2.47966	0.0891208
SLA783248	1	78.3151	0.000340226	0.998277	0.0443693
SLA789738	1	78.3344	0.00027829	1.37711	0.0455153
SLA802214	1	78.3751	0.000250788	4.49808	0.139734
SLA796094	1	78.3983	0.000323827	-0.603122	0.12124
SLA787078	1	78.4087	0.000273365	2.21984	0.134005
SLA769355	1	78.469	0.000432832	3.44477	0.0296327
SLA815452	1	78.4742	0.000337762	2.73426	0.0189862
SLA792206	1	78.4757	0.000326036	2.96828	0.0416144
SLA788624	1	78.5011	0.00019333	-1.98972	0.0293706
SLA801574	1	78.5028	0.000402329	4.59623	0.0196388
SLA811389	1	78.5087	0.000409434	1.98352	0.0395934
SLA811901	1	78.509	0.000398068	5.07774	0.0247379
SLA783805	1	78.5242	0.00036715	1.27644	0.0480478
SLA792735	1	78.5246	0.000401695	0.612907	0.0422348
SLA781206	1	78.5251	0.000393796	1.6582	0.0480478
SLA785193	1	78.5266	0.000389996	2.26795	0.0480478
SLA803361	1	78.5911	0.000417231	3.66332	0.0379057
SLA780015	1	78.5922	0.000404702	3.57842	0.0425004
SLA780043	1	78.7504	0.000116046	7.72953	0.701914
SLA771185	1	80.074	4.19383e-06	1.65944	0.0137166
SLA810576	1	80.0741	1.48764e-05	-0.861167	0.0258095
SLA805971	1	81.4256	0.000456232	0.0985923	0.0151031
SLA790707	1	81.5761	0.0002881	1.04259	0.272597
SLA813058	1	81.8793	0.000257375	5.23281	0.0379515
SLA785656	1	84.8405	0.000326642	6.01296	0.0428701
SLA816021	1	86.1293	0.000213519	4.68247	0.160007
SLA770321	1	86.1298	0.000194536	4.374	0.340059
SLA794192	1	86.13	0.000212213	5.65884	0.345958
SLA813955	1	86.1773	0.000326164	5.88799	0.29945
SLA792729	1	86.6839	7.27201e-05	4.51814	0.562825
SLA810290	1	86.8656	0.000189074	13.579	0.314382
SLA776658	1	86.867	0.00012383	7.67016	0.595411
SLA783689	1	86.8801	8.20257e-05	4.7459	0.508528
SLA789749	1	86.8865	1.00481e-05	4.4012	0.8553
SLA800253	1	87.564	0.000181215	2.31838	0.0399414
SLA799626	1	87.5664	0.00019799	-0.0757075	0.0459325
SLA783884	1	87.5996	0.00023984	1.52618	0.0384046
SLA773104	1	87.6161	0.000217889	-1.43229	0.0469027
SLA799508	1	87.6192	0.000146656	0.576216	0.0329584
SLA805472	1	87.6212	0.000190934	0.331528	0.0469027
SLA772448	1	87.6267	0.000145934	1.23588	0.0469027
SLA797684	1	87.6268	0.000174445	-1.46865	0.0469027
SLA773351	1	87.6278	0.000167009	2.61202	0.0469145
SLA812676	1	87.6328	0.000171841	-0.00595242	0.0469027
SLA806343	1	87.7104	0.000124169	0.785712	0.0498804
SLA817724	1	87.7357	0.000242349	3.34961	0.0350498
SLA795808	1	87.7406	0.000176261	11.8876	0.307879
SLA787214	1	87.7666	0.000160136	10.7655	0.137082
SLA770117	1	88.0429	6.14773e-05	5.43516	0.276801
SLA794386	1	88.1514	0.000131489	0.618577	0.0475823
SLA789516	1	88.153	0.000109566	-0.64681	0.0283238
SLA803405	1	88.1535	0.000148804	-0.658763	0.0428987
SLA777523	1	88.1551	3.60816e-05	-0.458581	0.0428987
SLA774703	1	88.1552	0.000114205	-0.024969	0.0428987
SLA776818	1	88.1555	7.43367e-05	-1.00001	0.0428987
SLA803645	1	88.1577	0.000146975	0.697377	0.0428987
SLA774454	1	88.1583	0.000140909	0.342719	0.0428987
SLA791386	1	88.1586	7.22308e-05	-0.239038	0.0428987
SLA787493	1	88.1607	0.000195704	4.45456	0.0455045
SLA801217	1	88.1616	2.5354e-05	1.31183	0.0428987
SLA803268	1	88.1631	6.34525e-05	0.204873	0.0428987
SLA809730	1	88.2428	5.42166e-05	0.164607	0.0432441
SLA812279	1	88.2448	0.000112514	1.14379	0.0416365
SLA811839	1	88.2448	8.20458e-05	0.0378608	0.0416365
SLA795268	1	88.2458	7.09803e-05	1.08311	0.0324431
SLA773007	1	88.2501	6.67982e-05	-0.58829	0.0410453
SLA815097	1	88.2501	0.000154003	-1.57693	0.0470648
SLA817126	1	88.2502	0.000121793	-1.10058	0.0320968
SLA782712	1	88.2533	8.85234e-05	5.71908	0.702611
SLA797674	1	88.2547	2.53487e-05	1.30095	0.0416365
SLA786330	1	88.2548	0.000125814	-1.35023	0.0416365
SLA768749	1	88.2549	7.6447e-05	0.321203	0.0320968
SLA771645	1	88.255	8.84393e-05	-0.475507	0.0355987
SLA776187	1	88.2587	9.87573e-05	0.107388	0.0324431
SLA782723	1	88.2652	0.000127697	-0.885651	0.0366863
SLA794769	1	88.2653	9.28094e-05	1.88158	0.0428189
SLA795276	1	88.2674	8.38008e-05	-1.12068	0.0244222
SLA799148	1	88.2691	0.000119485	-1.7118	0.0324431
SLA769943	1	88.2719	0.000117741	-0.196982	0.0421161
SLA814701	1	88.2849	0.000127974	-0.464989	0.0237279
SLA807122	1	88.2903	4.39713e-05	0.15893	0.0492945
SLA790318	1	88.298	0.000105349	-1.61058	0.0395377
SLA799457	1	88.3013	0.000130381	6.06835	0.111211
SLA776556	1	88.3095	8.4375e-05	-1.59603	0.0339275
SLA796259	1	88.311	0.000147843	2.94206	0.041797
SLA786003	1	88.3113	6.43779e-05	-1.02468	0.0395377
SLA808346	1	88.3114	7.87667e-05	-0.466567	0.0389997
SLA770346	1	88.3116	9.66299e-05	-1.83179	0.0395377
SLA776473	1	88.3116	0.000107538	1.06897	0.0389997
SLA792306	1	88.3118	3.48704e-05	0.715008	0.0395377
SLA809092	1	88.3119	0.000121467	0.380495	0.0395377
SLA809427	1	88.3155	7.40496e-05	-1.57265	0.0255629
SLA818187	1	88.3155	0.000107075	-0.458827	0.0316003
SLA788505	1	88.3155	6.18668e-05	-0.600838	0.0255629
SLA796580	1	88.3156	0.000114265	0.793605	0.0395377
SLA784710	1	88.3157	0.000167875	0.834956	0.0108881
SLA775672	1	88.3159	0.00012128	0.323652	0.0216833
SLA815121	1	88.316	8.91346e-05	-0.17497	0.0331233
SLA818564	1	88.316	7.44837e-05	1.33512	0.0343134
SLA773198	1	88.316	6.32883e-05	0.0280391	0.0395377
SLA811098	1	88.3161	5.90076e-05	-0.644767	0.0395377
SLA814873	1	88.3161	0.000139167	7.68981	0.0295809
SLA802971	1	88.3161	0.00017073	-0.177068	0.0194854
SLA813252	1	88.327	0.00010858	-0.804887	0.0278845
SLA771122	1	88.3271	9.73191e-05	0.698808	0.0196021
SLA791848	1	88.3271	0.000176828	-1.62134	0.0263895
SLA817685	1	88.3288	0.000181852	-0.318629	0.0196021
SLA817697	1	88.3288	9.06447e-05	-0.16626	0.0250374
SLA817547	1	88.3289	0.000174818	1.28133	0.0221476
SLA795311	1	88.3289	0.000162324	0.0436195	0.0196021
SLA798220	1	88.341	4.44459e-05	5.03215	0.273428
SLA792276	1	88.366	0.000160487	0.916698	0.0178309
SLA792250	1	88.6356	6.45157e-05	6.80909	0.163301
SLA815136	1	88.6954	0.000186791	12.6029	0.170476
SLA803054	1	88.937	0.000152841	5.47437	0.16614
SLA790403	1	88.9625	0.000115654	0.593959	0.0307768
SLA801368	1	88.9627	0.000153029	3.63717	0.0387429
SLA789861	1	89.0614	1.59312e-05	9.53015	0.500268
SLA777073	1	89.146	9.28642e-05	4.6447	0.336648
SLA787971	1	89.1535	0.000115572	2.20428	0.0296036
SLA806884	1	89.1849	0.00023795	3.11061	0.0171893
SLA806039	1	89.3853	4.84463e-05	9.73612	0.501027
SLA783703	1	89.3898	0.000137263	-3.25026	0.0153875
SLA768056	1	89.3932	0.000241374	7.28076	0.0139889
SLA817349	1	89.4121	2.37877e-05	4.80801	0.523231
SLA790561	1	89.4446	0.00017871	4.35547	0.0313285
SLA805219	1	89.4805	0.000162528	-0.785593	0.0328399
SLA771435	1	89.4805	2.79276e-05	6.63308	0.87238
SLA803061	1	89.5135	0.000122089	5.00034	0.325809
SLA806874	1	89.5136	0.000206578	4.80728	0.0779861
SLA810147	1	89.5305	0.000208985	0.911958	0.0104774
SLA781992	1	89.5339	0.000235948	1.33708	0.0132929
SLA767947	1	89.5464	0.000131147	5.6699	0.292042
SLA768910	1	89.5594	0.000176093	-0.506652	0.0494073
SLA799826	1	89.5862	0.000141867	-1.19538	0.0333966
SLA770187	1	89.5908	0.000122993	0.640264	0.0300365
SLA772728	1	89.594	0.000169286	0.381814	0.0300365
SLA783011	1	89.6167	0.000156982	1.63838	0.0300365
SLA796873	1	89.629	0.000185219	-0.841017	0.0300365
SLA795372	1	89.6311	0.000197867	-0.545444	0.0300365
SLA770952	1	89.6317	0.000281603	6.42934	0.0121211
SLA815500	1	89.6423	2.45849e-05	9.5918	0.312717
SLA774258	1	89.6435	0.000151277	0.219142	0.0300365
SLA813726	1	89.6582	0.000163411	1.00001	0.0300365
SLA792941	1	89.6658	0.000115352	7.93562	0.228302
SLA799258	1	89.6668	0.000155233	0.495376	0.0333966
SLA801575	1	89.6998	0.000151345	1.74091	0.0141503
SLA806428	1	89.8771	0.000146382	-0.199465	0.0248531
SLA788325	1	89.8777	0.00012258	-0.674297	0.0217396
SLA795003	1	89.8986	0.000241494	1.03807	0.0106156
SLA777699	1	89.9014	0.000156717	0.750779	0.0236064
SLA795246	1	89.903	0.000212949	-0.823317	0.0253164
SLA799584	1	89.9032	0.000176293	-0.904326	0.021766
SLA770472	1	89.9034	0.000151975	-0.950623	0.021766
SLA799708	1	89.9036	0.000173178	1.00001	0.021766
SLA809205	1	89.9061	0.000167823	1.31162	0.021766
SLA780028	1	89.9064	0.00020296	-0.373651	0.021766
SLA812647	1	89.9069	0.000111908	0.663126	0.021766
SLA796007	1	89.9075	0.00020908	1.24959	0.021766
SLA797472	1	89.9083	0.000196235	-0.550152	0.0236064
SLA778996	1	89.9131	0.000154966	0.84454	0.021766
SLA768087	1	89.92	0.000213696	0.104613	0.0236064
SLA801557	1	89.9211	0.000212937	-0.738247	0.0165853
SLA791785	1	89.9213	0.000166862	0.0179164	0.021766
SLA795377	1	89.9213	0.00018187	1.00001	0.0236064
SLA775388	1	89.9215	0.000154344	-0.202314	0.021766
SLA779756	1	89.922	0.000217005	1.27443	0.021766
SLA774546	1	89.9221	0.000136949	-0.225705	0.021766
SLA805532	1	89.9225	0.000154466	-1.66642	0.021766
SLA790768	1	89.9253	0.000187334	-1.0598	0.021766
SLA788247	1	89.9263	0.000201472	0.284712	0.0236064
SLA798491	1	89.9275	0.000282999	4.09041	0.0106186
SLA815157	1	89.9275	0.000121345	-0.439638	0.021766
SLA782466	1	89.9277	0.000175999	-1.00001	0.021766
SLA796534	1	89.9277	0.00021796	0.0402177	0.021766
SLA779354	1	89.9298	0.000172999	0.959367	0.021766
SLA773139	1	89.9303	0.000172262	1.21822	0.021766
SLA775102	1	89.9306	0.000198515	-1.51492	0.0243535
SLA771415	1	89.9311	0.000205607	1.70169	0.021766
SLA805147	1	89.9315	0.000242958	0.980893	0.032888
SLA775927	1	89.9317	0.000257379	0.70356	0.021766
SLA807340	1	89.932	0.000168177	0.774235	0.0236064
SLA786250	1	89.9322	0.000124255	-1.00001	0.021766
SLA770786	1	89.9324	0.000121635	1.33355	0.021766
SLA791533	1	89.9337	0.000198688	1.47877	0.0236064
SLA807897	1	89.9345	0.00019623	0.820113	0.0236064
SLA809203	1	89.9369	0.000196675	-0.0188026	0.0236064
SLA776705	1	89.937	0.000200734	-1.00001	0.0236064
SLA778182	1	89.9375	0.000166847	-0.968681	0.0236064
SLA773662	1	89.938	0.000147525	0.493317	0.0236064
SLA770648	1	89.9408	0.000175252	-0.437619	0.0236064
SLA773550	1	89.9413	0.000218222	0.964963	0.0236064
SLA772407	1	89.9436	0.000133294	1.6902	0.021766
SLA770303	1	89.9448	0.000190069	1.21276	0.021766
SLA794841	1	89.9452	0.000175631	1.04419	0.021766
SLA811973	1	89.9461	0.00028578	4.61121	0.223602
SLA767577	1	89.9462	0.000235568	0.943821	0.0236064
SLA787456	1	89.9501	0.000138124	0.351904	0.0236064
SLA803754	1	89.9532	0.000220207	1.22503	0.0236064
SLA793762	1	89.9554	0.00019277	0.397809	0.0236064
SLA808260	1	89.9569	0.000275949	0.288393	0.0236064
SLA815061	1	89.9569	0.000156542	0.927212	0.0236064
SLA805173	1	89.9594	0.000166657	0.433843	0.0236064
SLA768202	1	89.9602	0.000156068	-1.36448	0.0236064
SLA800077	1	89.9623	0.000208626	1.07463	0.0236064
SLA803631	1	89.9628	0.00016614	1.80397	0.0284906
SLA813428	1	89.9639	0.000226328	1.1018	0.0304556
SLA770465	1	89.965	0.000233945	-1.00001	0.021766
SLA810685	1	89.9664	0.000204976	1.42508	0.0236064
SLA770640	1	89.9706	0.000190499	1.57334	0.0236064
SLA794561	1	89.971	0.000252196	3.21256	0.00569919
SLA792401	1	89.9856	0.000212478	1.20364	0.021766
SLA810010	1	89.9901	0.000237615	-0.91759	0.021766
SLA794630	1	89.9905	0.000196192	-0.970363	0.021766
SLA811576	1	89.9909	0.000180224	1.38039	0.021766
SLA803458	1	89.9962	0.000243296	0.372778	0.021766
SLA801942	1	89.9985	0.00020002	0	0.021766
SLA814964	1	90.0003	0.000173203	1.09025	0.021766
SLA814285	1	90.0031	0.000205041	0.729187	0.0207159
SLA805038	1	90.0038	0.000193543	0.497288	0.021766
SLA801858	1	90.004	0.000177385	0.591333	0.021766
SLA802602	1	90.004	0.000149053	0.0945118	0.0285505
SLA791245	1	90.0041	0.000152908	-1.04956	0.021766
SLA772689	1	90.0042	0.000208359	-1.14832	0.021766
SLA781275	1	90.0053	0.00017714	-1.09679	0.021766
SLA792186	1	90.0096	0.000161769	-0.848555	0.021766
SLA779268	1	90.0376	0.000223454	1.17444	0.021766
SLA805328	1	90.0376	0.000202261	-0.540942	0.021766
SLA779695	1	90.0379	0.000139981	0.520473	0.021766
SLA802569	1	90.0406	0.000186734	-0.978956	0.021766
SLA777069	1	90.0616	0.000193465	-1.00001	0.021766
SLA812191	1	90.088	0.000236196	1.43555	0.021766
SLA812479	1	90.0904	0.000110217	1.03546	0.0275141
SLA776095	1	90.1144	0.000215959	0.837195	0.021766
SLA773112	1	90.1195	0.000108253	0.250211	0.0137378
SLA797543	1	90.1765	8.18492e-05	8.0833	0.667903
SLA806369	1	90.1819	0.000120299	0.226008	0.0346161
SLA793259	1	90.1837	0.000182025	0	0.021766
SLA775871	1	90.2623	1.63435e-05	5.8199	0.275761
SLA793996	2	3.72879	8.68884e-05	7.58545	0.929934
SLA801160	2	4.12366	0.000369014	0.520391	0.0109151
SLA791567	2	16.5706	0.000166923	4.61098	0.0369765
SLA773041	2	17.9318	0.000308424	10.9082	0.0447395
SLA770002	2	18.3042	0.00040711	2.20353	0.0151196
SLA816286	2	18.3516	0.000387873	3.18342	0.0168351
SLA809782	2	19.048	0.000318977	-0.057136	0.0841125
SLA777563	2	19.1562	0.000283552	1.28058	0.101088
SLA814446	2	19.1965	0.000418977	1.43679	0.0155763
SLA792691	2	19.7745	2.75352e-05	0.0123487	0.00348169
SLA812009	2	20.0679	0.000338312	2.21908	0.00873772
SLA811971	2	20.1381	0.000357545	2.48429	0.0297874
SLA788442	2	20.191	0.000320361	-0.696282	0.0594212
SLA804833	2	20.2459	0.00040462	-0.0324758	0.0436579
SLA785387	2	20.3642	0.000343936	1.60272	0.0455784
SLA800351	2	20.5384	0.000349	2.34198	0.0455784
SLA769368	2	21.07	0.000415367	2.41981	0.0347112
SLA804205	2	22.6988	4.45289e-05	1.24322	0.0258095
SLA814080	2	22.699	2.36321e-05	1.02534	0.0297905
SLA777268	2	22.7053	9.83835e-07	1.02754	0.0346292
SLA790139	2	24.2837	5.40196e-05	7.02795	0.5373
SLA772967	2	29.1658	0.000282003	0.667178	0.0673825
SLA772221	2	29.9451	0.000291175	-0.28456	0.09225
SLA780995	2	29.949	0.000363246	2.05346	0.0551137
SLA770244	2	29.9497	0.000336089	2.02352	0.0534669
SLA799475	2	29.9503	0.00033013	1.03988	0.0534669
SLA771695	2	29.9513	0.000344806	-0.660828	0.0534669
SLA811383	2	29.9519	0.000376756	2.30973	0.0594158
SLA808816	2	29.952	0.000365503	0.533786	0.0451277
SLA800034	2	29.9522	0.000336234	0.797754	0.0836062
SLA811286	2	29.9777	0.000316828	2.58993	0.046307
SLA784787	2	30.0156	0.000300306	4.67059	0.0690383
SLA773625	2	30.0477	0.000323432	0.0532164	0.0752737
SLA777200	2	30.05	0.000269344	-0.013275	0.0983541
SLA805928	2	30.0555	0.000354644	1.48497	0.059929
SLA802499	2	30.0558	0.000325208	-0.219627	0.0533746
SLA815784	2	30.0569	0.000322665	0.954971	0.0887538
SLA817220	2	30.0579	0.000374796	0.452551	0.0360765
SLA780158	2	30.0633	0.000419578	1.18109	0.0352193
SLA811434	2	30.073	0.000387102	1.62858	0.0450457
SLA807491	2	30.0737	0.000296305	1.45571	0.0709933
SLA798857	2	30.0738	0.000306825	-0.697237	0.0963925
SLA769935	2	30.0739	0.000269389	1.23103	0.0917657
SLA768356	2	30.0739	0.000272329	0.0378869	0.0709438
SLA811243	2	30.0755	0.00033174	1.92705	0.0661765
SLA807486	2	30.0762	0.000381406	1.45847	0.0480189
SLA804342	2	30.0762	0.000346906	2.56592	0.0639472
SLA775481	2	30.0769	0.000275128	-0.199803	0.0755219
SLA808735	2	30.077	0.000110969	5.99089	0.154026
SLA799958	2	30.0771	0.000269584	-1.13692	0.088675
SLA807152	2	30.0799	0.000195249	-0.498104	0.0163439
SLA786604	2	30.0823	0.000268269	1.35718	0.121472
SLA816275	2	30.0825	0.000281658	1.46957	0.121472
SLA770287	2	30.0953	0.000272143	1.33007	0.0854707
SLA780573	2	30.0954	0.000390229	2.61823	0.0427339
SLA799000	2	30.1039	0.000276951	-0.68905	0.087954
SLA771625	2	30.1117	0.000364338	2.68665	0.0368865
SLA810935	2	30.117	0.000411442	0.169766	0.039983
SLA798203	2	30.118	0.000290676	2.14985	0.0870083
SLA815898	2	30.1226	0.000329464	-0.123609	0.0389309
SLA776584	2	30.1237	0.00031137	1.55048	0.0755382
SLA803441	2	30.1246	0.000290816	-0.350826	0.0590938
SLA807664	2	30.1263	0.000333918	0.514298	0.0523489
SLA797319	2	30.1434	0.000294886	-1.34125	0.0755382
SLA779284	2	30.1873	0.000272386	1.70902	0.207988
SLA809138	2	30.6412	0.000319561	1.82359	0.0942714
SLA796928	2	30.6569	0.000192635	-0.602868	0.0461163
SLA812177	2	30.6633	0.000175835	3.61412	0.0406693
SLA801409	2	30.6639	0.000184464	2.61959	0.0427213
SLA806411	2	31.3805	0.000281819	5.36403	0.0800069
SLA818440	2	31.3826	0.000352976	7.46196	0.0912337
SLA795362	2	31.3831	0.000315048	2.44083	0.188465
SLA782648	2	31.3844	0.000272043	3.65017	0.159618
SLA809774	2	31.3864	0.00030866	1.51314	0.18639
SLA794900	2	31.3865	0.00027774	1.26329	0.158769
SLA798247	2	31.415	8.97869e-05	5.7485	0.658998
SLA798184	2	31.5139	0.000289092	4.85761	0.0820801
SLA787030	2	31.7034	0.000221541	6.4245	0.0928036
SLA798624	2	31.7456	6.45872e-05	1.37752	0.038633
SLA798852	2	31.7483	0.000168446	6.96418	0.103761
SLA778496	2	31.8336	0.000276173	4.55687	0.195584
SLA808315	2	31.9308	0.000223127	5.30699	0.237068
SLA779972	2	31.9741	0.000209596	4.62366	0.161961
SLA777787	2	32.0255	0.000273055	8.42782	0.0663857
SLA805176	2	32.45	0.000211245	6.89223	0.577987
SLA778517	2	32.5834	0.000289376	1.88048	0.332117
SLA770864	2	32.6113	0.000352654	1.34819	0.0673605
SLA810805	2	32.9943	0.000285238	2.02945	0.148468
SLA773352	2	32.9963	0.000310442	1.3262	0.209321
SLA794699	2	33.0134	0.000278874	2.23236	0.366329
SLA800543	2	33.0147	0.000279212	0.965461	0.265706
SLA807775	2	33.0535	2.43565e-06	4.47829	0.778946
SLA771320	2	33.1741	0.000233749	5.19641	0.342962
SLA797980	2	33.2019	0.000332827	23.3218	0.0399949
SLA805076	2	33.5166	0.000182502	4.68958	0.135678
SLA815610	2	33.5706	0.000168681	4.69392	0.470597
SLA790861	2	33.5827	1.02369e-05	5.50928	0.797495
SLA805419	2	33.6405	0.000157275	5.15289	0.192063
SLA777569	2	33.7095	0.000253998	10.2441	0.319589
SLA810190	2	33.7168	0.000273301	5.12481	0.129047
SLA789940	2	33.7484	0.000131902	4.47073	0.110237
SLA786326	2	34.0339	0.000215352	4.82162	0.74847
SLA796823	2	34.3828	0.000545831	26.7848	0.0148769
SLA792791	2	34.5562	0.000198413	4.88509	0.0844193
SLA803387	2	34.6568	0.000389478	3.66168	0.0790527
SLA798442	2	34.719	0.000453563	-0.31123	0.00534335
SLA787472	2	34.7569	0.000476519	2.51058	0.0855618
SLA771897	2	34.7618	0.000446417	1.33215	0.133901
SLA779584	2	34.7633	0.000537257	2.28523	0.0629493
SLA783378	2	34.7655	0.000542451	3.40173	0.0975929
SLA778051	2	35.1607	0.000118598	4.53944	0.761084
SLA805678	2	35.1828	0.000231799	5.3949	0.0550234
SLA788507	2	35.223	0.000287628	5.20349	0.00712234
SLA780123	2	35.3803	0.000195689	5.58849	0.0972316
SLA792912	2	35.4671	6.62896e-05	10.6188	0.912261
SLA768788	2	35.4928	0.0001944	10.0544	0.100928
SLA788207	2	35.5848	0.000211968	7.79389	0.132599
SLA769912	2	35.8828	3.65623e-06	-1.295	0.0111718
SLA772692	2	36.4083	1.49792e-05	4.73249	0.915348
SLA797141	2	36.4436	6.53587e-05	5.00721	0.780584
SLA807302	2	36.4445	0.000150272	5.9827	0.767503
SLA775574	2	37.4513	2.02223e-06	4.74982	0.982729
SLA802326	2	37.6471	0.000192267	4.91791	0.448847
SLA806137	2	38.4926	3.36713e-06	1.36496	0.013139
SLA774416	2	38.8009	0.0002281	5.35629	0.759198
SLA784225	2	38.804	9.51223e-05	4.68138	0.535533
SLA815187	2	38.8065	0.000541313	6.12637	0.0155624
SLA790251	2	38.8154	0.000119848	4.75753	0.197516
SLA813175	2	38.8185	0.000388556	1.0993	0.189352
SLA802155	2	38.8206	0.000324592	0.367772	0.218987
SLA779022	2	38.8228	0.000411367	1.50894	0.181586
SLA789459	2	38.8237	0.000351161	3.23526	0.196305
SLA806001	2	38.828	0.000295753	0.368046	0.315557
SLA817122	2	38.834	0.00034342	3.08653	0.0941429
SLA787902	2	38.838	0.000336652	0.970213	0.244514
SLA769765	2	38.8384	0.000295151	0.911992	0.258071
SLA772308	2	38.8519	0.000305044	0.0548005	0.350197
SLA810239	2	38.8552	0.000282955	1.13358	0.381718
SLA769075	2	38.8589	0.000272736	1.31945	0.381718
SLA806508	2	39.2152	0.000305868	0.952195	0.190555
SLA799491	2	39.6071	0.000401845	2.34576	0.119744
SLA785058	2	39.714	0.000275392	2.72589	0.477798
SLA801246	2	39.8466	0.00027667	1.40637	0.0938168
SLA790166	2	39.8518	0.000311929	2.35256	0.0498719
SLA791755	2	39.8521	0.00031437	2.97127	0.0490406
SLA818678	2	39.8983	4.53676e-05	5.58658	0.440574
SLA813652	2	39.9194	0.00036543	1.43337	0.0562441
SLA770086	2	40.0833	1.15868e-05	-1.24813	0.0292962
SLA768642	2	40.5286	0.000188141	3.25767	0.0494784
SLA770794	2	40.9639	0.000232908	4.90532	0.0223766
SLA782177	2	41.1317	0.000384797	6.53374	0.073207
SLA796841	2	41.9314	0.000456983	3.46155	0.025156
SLA774130	2	42.4823	0.00013123	5.04708	0.762406
SLA800263	2	42.6072	0.000135466	8.09764	0.186358
SLA791645	2	43.0016	0.000160045	6.40868	0.0695409
SLA793551	2	43.0936	4.241e-05	21.3742	0.408593
SLA798878	2	43.2158	0.000134854	10.6905	0.247548
SLA774972	2	43.2229	2.9316e-05	5.74349	0.488631
SLA794241	2	43.2244	9.03176e-05	5.37642	0.557318
SLA772700	2	43.2282	5.84089e-05	5.18802	0.26705
SLA797730	2	43.2337	0.000106165	10.2923	0.222502
SLA805115	2	43.2415	6.35526e-05	5.39507	0.432612
SLA788104	2	43.2417	0.000164861	12.5745	0.0982922
SLA782666	2	43.2418	0.000116253	8.76238	0.370127
SLA811409	2	43.2702	0.000162027	7.31	0.108569
SLA769814	2	43.2837	9.5433e-05	6.65473	0.118909
SLA769681	2	43.2896	0.000191363	10.9968	0.108569
SLA800527	2	43.2897	7.72929e-05	5.15558	0.218535
SLA797222	2	43.2899	0.000117686	5.56415	0.218535
SLA771544	2	43.2904	0.000147837	5.53984	0.26722
SLA805480	2	43.2914	0.00011985	5.34129	0.30405
SLA776443	2	43.2916	0.000111063	4.94868	0.391028
SLA791437	2	43.2918	8.69104e-05	5.54259	0.30405
SLA768862	2	43.2938	0.000124242	6.5116	0.101346
SLA799429	2	43.2948	0.000127263	4.59886	0.227896
SLA803862	2	43.31	7.58085e-05	6.13401	0.313079
SLA804845	2	43.3396	0.000354191	4.76643	0.0216058
SLA811020	2	43.3433	0.000139452	8.31543	0.281361
SLA791156	2	43.3555	0.000114771	6.45533	0.226935
SLA792590	2	43.3692	1.72182e-05	4.62206	0.214346
SLA773277	2	43.5557	0.000143609	4.72241	0.224978
SLA777943	2	43.5835	3.45986e-05	4.44273	0.205427
SLA815973	2	43.6538	8.29853e-06	5.04922	0.937015
SLA807049	2	43.722	8.12501e-05	4.48502	0.981456
SLA798966	2	43.7342	7.12141e-05	6.05542	0.425946
SLA774469	2	43.7548	1.04484e-08	4.4238	0.387766
SLA779594	2	43.8018	0.000325573	1.85312	0.00622786
SLA800208	2	43.8853	0.000314164	4.92795	0.00299208
SLA774062	2	44.1038	0.000427756	1.31943	0.0160043
SLA802008	2	44.4254	4.78158e-05	4.59027	0.613657
SLA794806	2	44.4254	3.12126e-05	5.11634	0.565106
SLA769759	2	45.1199	0.000108638	6.43094	0.319509
SLA809406	2	45.1218	0.000331682	31.6767	0.00275953
SLA775675	2	47.9483	0.000264572	2.41096	0.0321539
SLA797300	2	47.9489	0.000305426	1.38177	0.0783295
SLA810595	2	47.9501	0.00030967	1.12621	0.0700167
SLA802331	2	47.9506	0.000266217	1.78062	0.0300159
SLA775789	2	47.9508	0.000299277	3.2123	0.0487707
SLA783565	2	47.9517	0.000343471	4.18032	0.0651833
SLA812634	2	47.9594	0.000289711	2.07865	0.0783295
SLA772706	2	47.9632	0.000277797	1.6343	0.0206485
SLA811145	2	47.9635	0.000349435	6.44587	0.0416112
SLA782432	2	47.9636	0.00031767	4.24646	0.0553202
SLA770029	2	47.9636	0.000291133	2.51725	0.0800586
SLA792725	2	47.9638	0.000193443	1.99983	0.00851161
SLA803668	2	47.9645	0.000291953	1.24368	0.0266365
SLA789201	2	47.9651	0.000291098	3.96592	0.0557397
SLA800375	2	47.9663	0.000253831	7.6735	0.0618843
SLA781867	2	47.9665	0.000384533	7.97395	0.0353376
SLA798191	2	47.9677	0.000282257	1.75749	0.134459
SLA804035	2	47.9693	0.000303348	1.8969	0.137049
SLA791165	2	47.9694	0.000268068	-0.493374	0.0645443
SLA817834	2	47.97	0.000162646	7.64156	0.379479
SLA817797	2	47.9701	0.000187374	6.10269	0.254923
SLA817781	2	47.9702	6.84209e-05	4.44464	0.616449
SLA817603	2	47.9702	0.000184774	7.01835	0.273072
SLA817585	2	47.9704	0.000277536	3.14233	0.167136
SLA807495	2	47.9741	0.000321061	8.38219	0.0727689
SLA783827	2	47.9758	0.000346524	3.83858	0.0730334
SLA816128	2	47.9761	0.000318393	4.73636	0.0625296
SLA809254	2	47.9821	0.000231893	1.60856	0.0165458
SLA768025	2	47.9888	0.000242648	4.74038	0.0814934
SLA799486	2	48.0629	0.000268761	2.88858	0.0413871
SLA783931	2	48.0697	0.000359551	1.55029	0.0308288
SLA803413	2	48.0724	0.000271146	2.38595	0.0515823
SLA791759	2	48.0791	0.000164939	0.199438	0.0492587
SLA790293	2	48.0837	0.000293302	5.92396	0.0736235
SLA809433	2	48.0919	0.0002808	1.79184	0.0525168
SLA792781	2	48.0966	0.000262977	2.83832	0.0457148
SLA774244	2	48.1009	0.000279608	-0.814079	0.0469185
SLA802330	2	48.1604	0.00027365	4.40324	0.105317
SLA792813	2	48.1652	0.000224572	4.83654	0.105317
SLA784108	2	48.2764	0.000246985	7.2073	0.0611322
SLA786374	2	48.3053	0.000187205	9.91623	0.301889
SLA790434	2	48.5833	0.000244817	6.61877	0.0507053
SLA782782	2	49.8812	0.000134862	30.7473	0.50525
SLA806646	3	0.139873	0.000107629	4.86771	0.610781
SLA785323	3	0.493694	0.000492963	2.59735	0.10074
SLA812407	3	0.798465	0.000311904	2.20463	0.188428
SLA811096	3	0.828684	0.000346771	2.68809	0.3613
SLA805896	3	0.830351	0.000336889	1.29942	0.3613
SLA768326	3	0.833242	0.000173681	1.00093	0.0436148
SLA767638	3	1.02173	0.000344529	-0.134685	0.218973
SLA815255	3	1.02908	0.000287473	1.85759	0.240006
SLA797625	3	1.02947	0.000275765	0.0662796	0.240006
SLA773824	3	1.03466	0.000291157	1.02647	0.254355
SLA804130	3	1.04186	0.000318359	1.19981	0.156906
SLA768043	3	1.0427	0.00030743	3.1936	0.127404
SLA773298	3	1.04287	0.00025702	7.53985	0.114079
SLA788854	3	1.04298	0.000316043	1.56592	0.142075
SLA779057	3	1.04342	0.000322828	-1.29536	0.189026
SLA793153	3	1.0459	0.000282563	0.599668	0.20604
SLA783840	3	1.04691	0.000294261	0.978755	0.20604
SLA799254	3	1.04904	0.000269203	0.274947	0.189026
SLA774175	3	1.05009	0.000314878	2.00624	0.106108
SLA789675	3	1.05191	0.000335059	-1.92191	0.169084
SLA802601	3	1.05364	0.000308159	-0.150197	0.0331739
SLA784910	3	1.06681	0.00030706	0.688491	0.184815
SLA807068	3	1.06707	0.000333932	-0.275131	0.184815
SLA818447	3	1.06715	0.000331578	3.34143	0.180032
SLA791203	3	1.06731	0.000326843	1.17094	0.184815
SLA809540	3	1.068	0.000320193	0.726675	0.331382
SLA771250	3	1.06872	0.000282193	0.916167	0.382287
SLA782452	3	1.07029	0.000279735	0.123573	0.265964
SLA807654	3	1.07032	0.000313912	-0.116948	0.218756
SLA813899	3	1.07502	0.000268513	1.57303	0.157858
SLA772507	3	1.07506	0.000302528	0.25357	0.20604
SLA791701	3	1.07516	0.000269242	-0.940852	0.100269
SLA797831	3	1.07522	0.000290899	1.96395	0.161734
SLA815669	3	1.07528	0.00032331	1.1745	0.226518
SLA801952	3	1.07529	0.000358593	1.98996	0.168958
SLA791514	3	1.07656	0.000296683	0.352373	0.164962
SLA817784	3	1.25283	0.000117374	6.77005	0.442288
SLA786680	3	1.52579	0.000307715	-0.251441	0.156449
SLA807931	3	1.5312	0.000286958	1.00694	0.107194
SLA787698	3	1.55478	0.000271832	0.578774	0.0639859
SLA803866	3	1.5661	0.000351178	3.55647	0.0246366
SLA810509	3	1.57763	0.000291832	1.0165	0.113393
SLA805370	3	1.62711	0.000236813	0.0940952	0.0304255
SLA797352	3	2.29616	0.000505822	4.86613	0.0344001
SLA787470	3	2.29887	0.000401935	4.0206	0.0858372
SLA807278	3	2.31651	0.000500137	6.57632	0.0410451
SLA786021	3	2.323	0.000476365	2.88718	0.0427646
SLA804437	3	2.37214	0.00041629	3.82726	0.0919745
SLA818082	3	2.41987	5.45542e-05	-0.734847	0.0400259
SLA782328	3	3.09407	0.000237727	0.850758	0.0273486
SLA797764	3	5.37599	0.000204091	2.41967	0.040296
SLA780576	3	5.4579	0.000209531	0.861935	0.0243087
SLA772939	3	5.88588	0.000243362	11.8375	0.0599448
SLA770438	3	6.0944	0.000171592	11.5923	0.0579287
SLA783099	3	6.60838	0.000197023	9.77883	0.218511
SLA804558	3	6.60893	0.000214085	12.6301	0.192565
SLA802570	3	6.61044	0.000222752	7.26311	0.279862
SLA786423	3	6.61272	0.00015581	7.41746	0.703448
SLA790435	3	6.61883	0.000232302	7.74119	0.270049
SLA803935	3	7.91322	4.39064e-05	1.00001	0.0258095
SLA773610	3	7.91732	0.00019543	6.57654	0.332215
SLA802611	3	7.91873	0.000168816	4.41553	0.285903
SLA779814	3	7.92136	0.000283583	2.1692	0.220716
SLA800917	3	7.92154	0.000290168	1.02439	0.050315
SLA774402	3	7.9272	0.000262683	0.437046	0.0404901
SLA793117	3	7.92728	0.000316661	1.96395	0.00924472
SLA798893	3	7.92881	0.000305113	1.89601	0.0330029
SLA776087	3	7.9293	0.000290869	7.64582	0.16528
SLA801504	3	7.92972	0.000268811	2.48037	0.0700984
SLA778095	3	7.93466	0.000274234	1.93795	0.0738419
SLA818403	3	7.93827	0.000242417	1.50527	0.041492
SLA799118	3	7.93974	0.000209932	0.494303	0.0474566
SLA776300	3	7.94028	0.00018225	1.99085	0.048292
SLA799349	3	7.94029	0.0002249	1.4127	0.048292
SLA776448	3	7.94033	0.000260199	0.754428	0.0326744
SLA775193	3	7.94041	0.000216901	2.00298	0.0326744
SLA781045	3	7.94041	0.000245873	2.99529	0.0370057
SLA772450	3	7.94076	0.000218442	1.03956	0.0326744
SLA782989	3	7.94081	0.000241813	2.29911	0.0326744
SLA800940	3	7.94142	0.000209499	-0.697856	0.0480805
SLA817318	3	7.94181	0.000190929	3.71164	0.047998
SLA804238	3	7.94621	0.000194715	5.05348	0.174919
SLA772465	3	8.22705	0.000117187	6.04667	0.785423
SLA806098	3	8.32012	0.000281778	3.06311	0.234786
SLA800927	3	8.36408	0.000276075	-1.67216	0.214522
SLA807476	3	8.37633	0.000311594	-0.215307	0.402862
SLA768579	3	8.53178	0.000121882	6.48525	0.0591777
SLA773887	3	8.82285	0.000355887	2.08627	0.0316206
SLA787609	3	8.82309	0.000308191	1.19499	0.0344504
SLA797895	3	8.87201	0.000315055	2.85158	0.133556
SLA783850	3	9.14693	7.72586e-05	4.94457	0.738347
SLA778240	3	9.16294	2.70476e-05	4.85636	0.29678
SLA802735	3	9.1706	4.5644e-05	5.74985	0.540283
SLA780351	3	9.22615	4.13395e-05	5.41648	0.785397
SLA802175	3	9.23292	2.9737e-05	6.08681	0.966567
SLA778820	3	13.3882	0.000276108	0.685293	0.381037
SLA807765	3	13.4329	0.000257146	10.1228	0.0470006
SLA788909	3	15.5566	2.31359e-05	4.51005	0.973609
SLA809405	3	15.6234	0.000216617	1.25492	0.0223798
SLA800996	3	19.5321	0.00022777	0.386273	0.0336566
SLA770020	3	20.3132	0.000189805	10.0854	0.0470006
SLA775395	3	20.8972	0.000206574	2.2645	0.0336566
SLA790699	3	25.3417	0.000298459	-0.510052	0.148887
SLA794891	3	26.1532	0.000292361	1.62787	0.0271235
SLA806479	3	27.4637	0.000219775	-0.622625	0.0273486
SLA795594	3	29.0274	0.000198174	-0.670323	0.0336566
SLA771451	3	29.759	0.000219521	-1.21935	0.0336566
SLA773240	3	32.0287	8.09175e-05	4.69421	0.744728
SLA804272	3	32.3099	0.000305818	3.68096	0.294683
SLA780163	3	34.5396	5.59852e-05	4.78676	0.915586
SLA769978	3	36.9863	0.000171583	0.588047	0.0336566
SLA777826	3	36.9898	0.000186044	9.97871	0.0644416
SLA812317	3	38.118	0.000102142	0.397691	0.0471838
SLA771245	3	40.7817	0.000297255	2.32052	0.0273486
SLA807905	3	40.8894	0.000197563	-0.956344	0.0223798
SLA811853	3	41.4542	0.000232694	1.50214	0.0274138
SLA776198	3	41.9371	0.000194477	4.42505	0.314104
SLA774771	3	43.4092	0.000257659	2.24471	0.027653
SLA776528	3	44.1864	7.12438e-05	1.15296	0.0375018
SLA776035	3	44.6499	4.71315e-05	4.81097	0.545627
SLA812689	3	46.1953	0.00010503	5.75587	0.279326
SLA779163	3	46.7033	4.73094e-05	4.51018	0.83203
SLA803371	3	47.9348	0.000412353	1.41317	0.022357
SLA802972	3	48.1067	0.000307743	1.85439	0.398803
SLA811219	3	48.1077	0.000279598	2.48631	0.44098
SLA785700	3	48.1936	0.000104155	11.3425	0.332655
SLA769437	3	48.925	0.000278602	0.575071	0.111018
SLA789084	3	48.9349	0.000273554	0.342705	0.0811162
SLA787168	3	48.943	0.000273896	2.53283	0.0905821
SLA780312	3	48.9432	0.000280608	-0.495039	0.124976
SLA778234	3	48.9486	0.000273645	1.04283	0.112842
SLA772040	3	48.9564	0.000347227	2.32264	0.0189105
SLA797346	3	48.963	0.000274333	-0.623807	0.0547758
SLA813799	3	48.9659	0.000280424	1.19905	0.0424403
SLA782409	3	48.9668	0.000277548	0.551639	0.0353208
SLA775780	3	48.967	0.000281034	0.104353	0.0424403
SLA779585	3	48.9672	0.000294999	1.69549	0.0547758
SLA791389	3	48.9673	0.000299607	0.837674	0.0547758
SLA807717	3	48.968	0.000324975	0.261958	0.0430022
SLA780898	3	48.9754	0.000311331	-0.472474	0.0489601
SLA812661	3	48.9818	0.000321813	0.654988	0.0517006
SLA800012	3	52.2415	0.00013992	6.84973	0.701833
SLA799456	3	52.9382	0.000257338	6.24557	0.363529
SLA786398	3	53.9187	0.000138212	7.04214	0.965308
SLA801803	3	53.9265	6.4134e-06	4.48565	0.274054
SLA799472	3	53.9625	0.000269004	1.12338	0.751937
SLA817838	3	53.9693	0.000268342	5.14093	0.890727
SLA787629	3	53.9738	0.000277218	0.80975	0.629575
SLA799078	3	53.9965	6.48892e-05	7.97201	0.250832
SLA783227	3	54.1249	0.000300255	0.134421	0.554621
SLA786055	3	54.2189	0.000239102	4.40893	0.530239
SLA780987	3	54.2255	7.76638e-05	7.69242	0.991468
SLA777921	3	54.2279	1.92415e-05	6.9085	0.996413
SLA799891	3	54.229	6.70507e-05	5.36575	0.942079
SLA797456	3	55.6917	8.30141e-05	4.50697	0.840062
SLA786150	3	55.6998	0.000151807	6.01072	0.640425
SLA791458	3	55.7447	0.000303876	6.05399	0.16295
SLA813313	3	55.8417	0.000424337	7.92722	0.0595458
SLA783367	3	55.9347	0.000162609	5.27258	0.396558
SLA772484	3	55.9821	0.000463202	6.82213	0.0481337
SLA797509	3	56.2447	0.000331496	5.97125	0.236074
SLA779809	3	56.3834	0.000272931	2.18055	0.123279
SLA786080	3	56.554	0.000287021	-0.114663	0.225931
SLA813348	3	56.6019	0.000124194	6.15186	0.449324
SLA804106	3	56.6997	0.000326056	0.896057	0.32515
SLA776849	3	56.7187	0.000309749	0.757209	0.329978
SLA803591	3	56.7339	0.000107248	4.45613	0.797947
SLA785020	3	56.8769	0.000161097	4.49211	0.46198
SLA794608	3	56.8804	0.000172079	8.28673	0.592607
SLA767765	3	57.0562	0.000317119	6.25855	0.0355634
SLA810887	3	57.0747	0.000457987	9.08806	0.0185961
SLA781843	3	57.0846	0.000468516	12.8101	0.00924884
SLA805054	3	57.2485	0.000250693	5.10838	0.259633
SLA797685	3	57.5228	0.00013856	13.4252	0.23702
SLA793764	3	57.5645	0.000110402	4.46358	0.260173
SLA772679	3	57.578	6.5506e-05	9.28956	0.611998
SLA815932	3	57.5832	5.33648e-05	13.2535	0.279076
SLA817390	3	57.5861	0.000134722	10.305	0.117476
SLA794102	3	57.6236	7.10994e-05	4.90456	0.425318
SLA782279	3	57.6237	0.000144152	15.231	0.0587539
SLA784262	3	57.6237	0.00010945	4.76186	0.122327
SLA799952	3	57.6252	0.00010916	4.45544	0.128459
SLA786467	3	57.6443	5.33171e-05	5.26611	0.738672
SLA813435	3	57.6783	0.000175207	4.7867	0.293973
SLA790121	3	57.6944	9.39264e-05	6.46329	0.11216
SLA818407	3	57.6981	0.000102982	8.58124	0.155756
SLA802036	3	57.704	6.1193e-05	6.465	0.566468
SLA802235	3	57.7136	9.79026e-05	10.3888	0.18652
SLA771935	3	57.7141	7.47533e-05	7.51774	0.1638
SLA816353	3	57.7147	0.000101817	5.65002	0.315144
SLA809278	3	57.7194	9.5632e-05	18.0759	0.136508
SLA797953	3	57.7213	5.83165e-05	5.2699	0.139483
SLA775157	3	57.7215	0.000137006	5.69753	0.113266
SLA781692	3	57.741	0.000111461	5.52334	0.207811
SLA815285	3	57.7454	0.000111759	6.35115	0.648247
SLA803682	3	57.7473	8.1201e-05	10.4833	0.0859909
SLA783795	3	57.7477	0.000113552	5.39172	0.504162
SLA811063	3	57.7497	0.00015689	4.52041	0.104272
SLA805511	3	57.7526	0.000126416	6.22708	0.204553
SLA784819	3	57.7794	4.82302e-05	9.96103	0.570286
SLA780100	3	57.7796	7.05977e-05	4.46331	0.344814
SLA788204	3	57.7834	9.86784e-06	12.1922	0.962721
SLA802510	3	57.7967	0.000153864	4.48517	0.166192
SLA796246	3	57.7968	0.000138197	4.5979	0.0846783
SLA784476	3	57.799	0.000111462	4.99723	0.146218
SLA768649	3	57.8024	3.74963e-05	7.01034	0.706267
SLA791059	3	57.8025	9.61555e-05	5.11851	0.491653
SLA778554	3	57.8053	0.000208924	8.27356	0.0671535
SLA802931	3	57.8119	0.000182943	10.5274	0.066173
SLA800893	3	57.8168	0.000271125	2.54184	0.116006
SLA788608	3	57.8207	0.000150641	16.3953	0.111462
SLA793200	3	57.8339	0.000172104	6.71147	0.3089
SLA776180	3	57.8388	0.000215326	2.16527	0.0493114
SLA779252	3	57.8421	0.000113838	12.6131	0.194542
SLA788283	3	58.1245	0.000171913	7.23624	0.551651
SLA795716	3	58.2032	5.26752e-05	9.12168	0.483391
SLA769046	3	58.2995	0.000270876	2.81364	0.0548606
SLA777438	3	58.3183	0.000200419	4.66126	0.0339382
SLA812391	3	58.3183	0.000177597	4.9136	0.0327869
SLA783590	3	58.3287	0.000323764	3.72363	0.0519957
SLA784172	3	58.5137	0.000321981	3.29591	0.0817504
SLA780173	3	58.5636	0.000275619	5.72888	0.129574
SLA816278	3	58.5639	0.000169101	5.88374	0.129542
SLA774878	3	58.5692	0.000246939	5.21745	0.208668
SLA813969	3	58.5737	0.000275479	2.82113	0.122337
SLA782849	3	58.5742	0.000282328	0.329905	0.127105
SLA777449	3	58.5811	0.000273027	1.707	0.143368
SLA800813	3	58.5955	0.000277213	2.71647	0.125976
SLA774684	3	58.5956	0.00024545	8.89209	0.119038
SLA818590	3	58.5956	7.4953e-06	14.8519	0.80619
SLA779575	3	58.5961	0.000258421	7.07735	0.103688
SLA775263	3	58.5964	0.000344556	4.05883	0.0654019
SLA793381	3	58.5977	0.00028644	6.83214	0.0896093
SLA775484	3	58.5984	0.000274099	6.36353	0.179359
SLA783000	3	58.5986	0.000286336	13.7042	0.085199
SLA806250	3	58.6008	0.000203218	20.6485	0.156646
SLA792644	3	58.6056	0.000236004	9.93043	0.0961917
SLA785318	3	59.384	0.000109472	7.35516	0.634561
SLA782936	3	59.3862	4.25779e-05	9.1275	0.851554
SLA772213	3	59.387	0.000147234	7.91228	0.483408
SLA778969	3	59.3887	0.00012415	8.4633	0.612538
SLA816991	3	59.3909	8.52181e-05	8.1382	0.461658
SLA794482	3	59.3914	2.46275e-05	6.32796	0.854369
SLA800740	3	59.3915	4.23583e-05	8.5983	0.947739
SLA772184	3	59.3922	0.000158586	7.14505	0.483408
SLA784619	3	59.3923	0.000102402	8.42417	0.765504
SLA799200	3	59.3968	6.39277e-05	5.12785	0.53244
SLA801350	3	59.4298	4.37841e-05	8.36133	0.4147
SLA809015	3	59.4662	4.78904e-05	6.99549	0.645851
SLA784435	3	59.5085	7.09428e-05	7.1142	0.266321
SLA780485	3	59.538	0.000109373	8.7151	0.395623
SLA775046	3	59.5888	6.94582e-05	5.61336	0.122249
SLA783826	3	59.6091	0.000150396	4.55653	0.154549
SLA787743	3	59.6271	0.000185028	2.25189	0.034923
SLA778849	3	59.6533	0.000219815	2.2809	0.0149874
SLA777388	3	59.6533	0.000162901	2.11882	0.0232681
SLA769834	3	59.6547	0.000217498	1.44779	0.0461542
SLA785507	3	59.6559	0.000186855	1.14325	0.0451005
SLA796117	3	59.6594	0.000216987	1.41696	0.0486342
SLA798069	3	59.6628	0.000231642	1.4686	0.0354616
SLA806441	3	59.7161	0.000124841	4.5603	0.551119
SLA767960	3	59.897	0.000288767	0.354094	0.0241119
SLA780265	3	59.9005	0.000335415	5.03835	0.00685295
SLA810364	3	59.9173	0.000285809	1.78186	0.0562173
SLA794766	3	59.9426	0.000430781	24.2469	0.00532301
SLA781579	3	59.9485	0.000470935	33.0397	0.0133094
SLA800939	3	59.9788	0.000176569	1.76667	0.0339499
SLA777810	3	59.9864	0.000162803	4.63577	0.0446639
SLA814562	3	60.0102	0.000331071	17.651	0.039345
SLA807571	3	60.033	0.000149125	-0.414452	0.0496374
SLA791900	3	60.0338	0.000205175	1.74912	0.0402171
SLA786210	3	60.0343	0.000205911	1.96481	0.0279427
SLA776590	3	60.0348	0.000190814	0.74237	0.0496374
SLA783764	3	60.0412	0.000202975	-0.196825	0.030259
SLA812630	3	60.0415	0.000222863	0.00665845	0.0353397
SLA804250	3	60.0416	0.000183628	2.77811	0.0253038
SLA788836	3	60.0416	0.000192439	1.68369	0.0353397
SLA807222	3	60.0417	0.000225516	1.14249	0.0353397
SLA775540	3	60.0419	0.000107829	0.0040374	0.0353397
SLA785040	3	60.0424	0.000364213	19.3096	0.0158397
SLA771436	3	60.0429	0.000358798	18.9493	0.011571
SLA801945	3	60.045	0.000223167	0.218449	0.0496374
SLA778294	3	60.0472	0.000250241	-0.642684	0.0421778
SLA768979	3	60.0475	0.000198412	1.34295	0.0421778
SLA813755	3	60.0485	0.000244222	-0.748553	0.0496261
SLA781093	3	60.0485	0.000256805	-0.404526	0.0400083
SLA779566	3	60.0485	0.00021785	1.73364	0.0234365
SLA784316	3	60.0495	0.000221899	0.53868	0.0421778
SLA767777	3	60.0496	0.00022987	-0.371617	0.0421778
SLA778783	3	60.0533	0.000212014	1.09632	0.0275039
SLA768323	3	60.0533	0.000159929	1.03564	0.0275039
SLA808962	3	60.0534	0.000221607	1.29428	0.0311288
SLA779561	3	60.0545	0.000246354	2.41927	0.0295315
SLA782644	3	60.0545	0.000242737	0.13086	0.0295315
SLA781845	3	60.0546	0.000319288	4.18257	0.0158657
SLA789391	3	60.0547	0.000215828	1.23335	0.0421778
SLA783752	3	60.0551	0.000276701	0.88685	0.00991441
SLA770930	3	60.0551	0.000212597	1.06623	0.0378991
SLA798293	3	60.0552	0.000182515	5.9307	0.0268111
SLA784657	3	60.0553	0.000261632	8.69332	0.0262308
SLA812622	3	60.0558	0.000236831	0.474876	0.0441664
SLA779367	3	60.058	0.000197233	0.523723	0.0443888
SLA793443	3	60.0583	0.000214362	1.38966	0.0421778
SLA815961	3	60.0584	0.000206557	2.19876	0.0421778
SLA775990	3	60.0586	0.000271267	2.13833	0.0181691
SLA793529	3	60.0588	0.000272069	4.33551	0.0225249
SLA779421	3	60.0595	0.000277013	1.34932	0.0373773
SLA799244	3	60.0596	0.000258119	3.55212	0.0158657
SLA797874	3	60.0611	0.000305437	0.812885	0.0421778
SLA788672	3	60.0614	0.000257738	1.47102	0.0197803
SLA809858	3	60.0616	0.000271615	-0.942712	0.0340316
SLA797375	3	60.0617	0.000250048	-0.5192	0.0340316
SLA789478	3	60.0618	0.000235301	0.781814	0.0421778
SLA784185	3	60.0619	0.000235648	0.866167	0.0421778
SLA770366	3	60.0633	0.000220066	1.5409	0.0319957
SLA809487	3	60.0636	0.000254669	1.20046	0.0421778
SLA815056	3	60.0652	0.000284051	2.45828	0.00795142
SLA786072	3	60.0661	0.000270923	2.17239	0.0181691
SLA776071	3	60.0696	0.000228693	2.52079	0.0341761
SLA788191	3	60.07	0.000242048	2.12966	0.0253038
SLA803117	3	60.0709	0.000170385	1.57769	0.0253038
SLA769755	3	60.0709	0.000223906	1.36169	0.0225306
SLA807808	3	60.0718	0.000166022	-0.601191	0.042006
SLA772018	3	60.072	0.000185094	2.26942	0.0253038
SLA789288	3	60.0722	0.000214388	0.638926	0.042006
SLA783037	3	60.0722	0.000244958	3.1035	0.0203737
SLA790347	3	60.0764	0.000271882	1.10157	0.0270573
SLA790673	3	60.0801	0.000221608	1.34163	0.0402171
SLA778693	3	60.0829	0.000211598	3.21594	0.0197803
SLA802645	3	60.0881	0.000186908	1.15317	0.0496374
SLA769610	3	60.0919	0.000163047	1.22032	0.0337122
SLA790000	3	60.0957	0.000188559	0.564701	0.0402171
SLA793588	3	60.0977	0.000201747	2.43895	0.0426026
SLA816088	3	60.0992	0.000225402	0.114162	0.0402171
SLA780098	3	60.0993	0.000225437	0.269463	0.0402171
SLA798132	3	60.1043	0.000190207	1.28928	0.044606
SLA795703	3	60.1075	0.000189326	-0.371264	0.0310597
SLA789748	3	60.1076	0.000265257	1.70327	0.0387788
SLA769925	3	60.1126	0.000190924	1.01629	0.043365
SLA806362	3	60.1157	0.000209981	2.35909	0.0470155
SLA780879	3	60.1164	0.000223216	0.717237	0.0338987
SLA779191	3	60.1247	0.000239355	2.17181	0.017056
SLA778444	3	60.1555	0.000235987	1.65421	0.020269
SLA802597	3	60.1589	0.00020403	0.0749285	0.0413663
SLA771135	3	60.1646	0.000230116	2.10776	0.0310597
SLA809786	3	60.1649	0.000188399	0.223018	0.0451469
SLA791297	3	60.167	0.000133127	0.571932	0.0413663
SLA787845	3	60.1709	0.000239118	3.90147	0.0366607
SLA784617	3	60.1717	0.00025516	1.59047	0.0307445
SLA804458	3	60.1717	0.000191556	0.74561	0.0307445
SLA771444	3	60.173	0.000273805	1.36614	0.0328127
SLA794438	3	60.1741	0.00022073	-0.760457	0.0481986
SLA781284	3	60.1753	0.000220265	0.354673	0.0324565
SLA814077	3	60.1771	0.000190558	-0.240247	0.0497425
SLA768474	3	60.1781	0.000267247	-1.02911	0.0497425
SLA792858	3	60.1811	0.000240214	-0.719912	0.0288598
SLA807289	3	60.1852	0.000210742	1.21812	0.0264727
SLA812820	3	60.1895	0.000228131	0.630014	0.0497425
SLA768523	3	60.1928	0.000208051	0.805805	0.0497425
SLA798816	3	60.1929	0.000246697	-0.976348	0.0426617
SLA787512	3	60.1929	0.000224571	0.832651	0.0130561
SLA791655	3	60.1936	0.000187508	0.94409	0.0364623
SLA786294	3	60.1938	0.000243184	6.55125	0.0151665
SLA773229	3	60.1955	0.000225083	1.36601	0.0264727
SLA784729	3	60.1957	0.000250336	-0.284059	0.0274018
SLA771068	3	60.1958	0.000194905	1.7285	0.0307445
SLA794070	3	60.1959	0.000204089	1.92286	0.0307445
SLA805165	3	60.1961	0.000212819	0.566947	0.0341012
SLA778406	3	60.1968	0.000268171	2.93008	0.0188309
SLA768015	3	60.2009	0.000248552	0.412193	0.00966314
SLA800590	3	60.2009	0.000260047	0.954427	0.0205237
SLA809473	3	60.2016	0.000196437	-0.227676	0.0185122
SLA806061	3	60.2039	0.000164077	1.62774	0.0386742
SLA774121	3	60.204	0.000262497	0.495909	0.023715
SLA784641	3	60.2041	0.000217177	0.1994	0.0405791
SLA771380	3	60.2045	0.000177488	0.0591187	0.0291384
SLA773725	3	60.2059	0.000207186	-0.0296861	0.0205237
SLA796281	3	60.209	0.000188993	0.429648	0.0424044
SLA800421	3	60.2325	0.000202665	-0.103129	0.0466735
SLA800303	3	60.2366	0.000287448	-1.41904	0.0378466
SLA790495	3	60.239	0.000212513	0.804676	0.0450307
SLA813367	3	60.2392	0.000194304	1.19733	0.0450307
SLA809964	3	60.2394	0.00020102	1.5007	0.0450307
SLA775700	3	60.243	0.000273118	0.86233	0.067156
SLA803776	3	60.2454	0.000259636	-0.72867	0.0496897
SLA802954	3	60.2475	0.000266566	-0.535781	0.0381822
SLA812787	3	60.2517	0.000234324	0.579602	0.0360206
SLA804698	3	60.556	4.6942e-05	4.67809	0.425252
SLA778888	3	60.8334	0.000199231	4.8542	0.596372
SLA807598	3	60.884	4.96841e-05	1.68213	0.0177663
SLA810661	3	60.8882	9.63187e-05	1.21698	0.0329586
SLA786911	3	60.934	8.81356e-06	0.917649	0.0463111
SLA805739	3	61.0661	2.67264e-05	4.70207	0.55694
SLA777767	3	62.0428	0.00027333	1.40121	0.122527
SLA776021	3	62.0508	0.000281173	0.768475	0.0784554
SLA808621	4	0.620673	0.000242632	2.21246	0.0440489
SLA769589	4	0.688946	0.000323103	1.88388	0.0932559
SLA787916	4	0.71004	0.000275335	0.0400863	0.149698
SLA808252	4	0.713502	0.000299028	1.22808	0.147362
SLA808718	4	0.713514	0.000309234	-1.70773	0.154
SLA801347	4	0.713815	0.000279569	0.504043	0.17749
SLA813269	4	0.746702	0.000250053	6.34033	0.177414
SLA793173	4	0.773887	0.000288848	2.12462	0.308703
SLA795726	4	0.800946	0.000335177	1.36822	0.323178
SLA788990	4	0.801203	0.000412252	1.20981	0.0982106
SLA805473	4	0.818158	0.000396853	1.3534	0.172636
SLA785082	4	0.821715	0.000479537	-0.707501	0.035936
SLA804530	4	0.900673	0.000375216	2.073	0.130461
SLA770625	4	0.900776	0.000480068	0.340958	0.0179904
SLA774770	4	0.905119	0.00038197	-0.585708	0.153468
SLA810256	4	0.924067	0.000326507	-2.53291	0.103064
SLA768891	4	0.92479	0.000370999	0.538676	0.111103
SLA787969	4	0.983419	0.000109569	4.37696	0.626911
SLA805842	4	1.87546	3.59882e-05	4.69659	0.659122
SLA809117	4	2.05314	0.000267757	2.6833	0.124648
SLA791666	4	2.0533	0.000327328	4.62032	0.128891
SLA773265	4	2.05434	0.000241181	7.27647	0.30868
SLA782698	4	2.15545	8.68428e-06	4.4141	0.878887
SLA807041	4	2.31529	6.60992e-05	6.52704	0.6626
SLA796789	4	2.36118	0.000200353	4.59285	0.461456
SLA794081	4	2.95453	0.000198186	4.92438	0.198651
SLA817705	4	3.21258	0.000172024	9.21562	0.243732
SLA801457	4	3.21282	0.000230141	4.71663	0.480658
SLA771957	4	3.214	0.000127906	4.8605	0.611073
SLA797174	4	3.21406	0.000179442	5.2131	0.482168
SLA814682	4	3.21451	6.5472e-05	4.80055	0.640338
SLA786883	4	3.23085	0.000270252	2.61503	0.46644
SLA779168	4	4.0716	0.000108947	8.52401	0.148377
SLA811958	4	4.16993	1.56529e-05	8.04149	0.713325
SLA776567	4	4.28089	0.000114235	4.60131	0.597863
SLA788830	4	4.38724	0.000309442	1.6541	0.330723
SLA773289	4	4.4547	0.000464624	3.16138	0.110101
SLA803833	4	4.46096	0.000329316	0.173672	0.183154
SLA797986	4	4.46425	0.000481983	3.18261	0.110101
SLA790747	4	4.4701	0.000281895	1.09321	0.38691
SLA773495	4	4.54204	0.00029622	-0.944383	0.355884
SLA813128	4	4.55054	0.00043943	-0.415057	0.108129
SLA801785	4	4.55327	0.000290644	-1.37166	0.157247
SLA804928	4	4.55663	0.000519465	1.25257	0.0473959
SLA768294	4	4.57588	0.000290295	2.76587	0.389621
SLA770174	4	4.57599	0.000376324	0.0667275	0.183468
SLA787603	4	4.58522	0.000270317	-0.317166	0.434156
SLA808896	4	4.5869	0.00027621	-0.464299	0.548166
SLA805638	4	4.58755	0.000505739	2.69717	0.122045
SLA788613	4	4.58756	0.000352183	1.7902	0.3284
SLA810425	4	4.58793	0.000477101	1.99525	0.0928247
SLA780249	4	4.5883	0.000498617	3.06883	0.0928247
SLA790384	4	4.58845	0.000511323	3.56558	0.0882582
SLA814143	4	4.61046	0.000317381	1.99123	0.176001
SLA789587	4	4.63384	0.000320118	0.39723	0.17062
SLA782587	4	4.63433	0.00059864	3.43151	0.0143536
SLA797908	4	4.63496	0.00027179	0.911903	0.203906
SLA790208	4	4.63515	0.000554387	1.64058	0.0143536
SLA813554	4	4.63554	0.000631496	0.896479	0.0143536
SLA790604	4	4.63584	0.00059295	2.87247	0.0147687
SLA818041	4	4.63585	0.000546733	2.61911	0.0182035
SLA796412	4	4.63586	0.000552799	3.01696	0.0143536
SLA816210	4	4.63592	0.000542678	1.66285	0.0216559
SLA771804	4	4.63605	0.000576948	3.72863	0.0106908
SLA810285	4	4.63673	0.000539368	-0.0057656	0.0195817
SLA811754	4	4.63681	0.000599138	2.66417	0.0195817
SLA806113	4	4.63685	0.000581518	2.54404	0.0143536
SLA814522	4	4.63693	0.000493401	1.62511	0.0195817
SLA813227	4	4.63702	0.000526331	0.365806	0.039866
SLA767916	4	4.63712	0.00030488	0.878656	0.639714
SLA809341	4	4.67465	0.000545776	-0.750132	0.0218952
SLA786697	4	5.04782	0.000140001	4.87139	0.932896
SLA802142	4	5.25946	0.000202743	5.63631	0.447454
SLA782297	4	5.27033	0.000100109	6.19858	0.732621
SLA779496	4	5.27391	2.09462e-05	5.74414	0.767443
SLA794633	4	5.28984	9.74561e-05	4.78555	0.520943
SLA805175	4	5.36405	0.000180752	5.2667	0.865164
SLA793112	4	5.569	0.000197283	31.4142	0.160748
SLA810169	4	5.61009	0.000118319	6.1214	0.851655
SLA816077	4	5.71193	0.000114521	6.81824	0.502619
SLA788096	4	5.72713	0.000150155	4.51389	0.289577
SLA794491	4	5.7761	0.000202744	21.5936	0.956017
SLA809601	4	6.01801	0.00011889	9.70637	0.666051
SLA783523	4	6.68112	7.32417e-06	5.76188	0.819903
SLA787890	4	7.2968	0.000134535	10.855	0.833335
SLA799287	4	9.45074	2.08637e-05	4.37881	0.448754
SLA810435	4	9.82993	0.000291139	6.64668	0.239532
SLA802059	4	9.83975	1.5076e-06	6.21324	0.436896
SLA781750	4	10.3764	2.23575e-05	7.21694	0.947161
SLA779990	4	10.403	6.59567e-05	11.2052	0.940413
SLA806096	4	10.9533	4.49549e-05	6.98949	0.584575
SLA814778	4	11.0127	0.00019204	8.27869	0.321405
SLA806659	4	11.0778	8.06919e-05	4.38267	0.618888
SLA807178	4	11.3347	0.000148185	5.65049	0.114202
SLA798116	4	11.4741	1.77549e-05	5.98951	0.342135
SLA781190	4	53.2082	1.10518e-05	7.65499	0.888569
SLA769066	4	53.218	0.000230275	5.15859	0.295974
SLA818517	4	53.2239	1.2055e-06	7.82598	0.967753
SLA781124	4	53.2954	0.000251633	4.91781	0.237722
SLA801997	4	53.403	0.000210753	6.39191	0.580779
SLA811835	4	53.568	4.02691e-05	5.81683	0.238512
SLA795518	4	53.5775	1.24884e-05	4.61001	0.204043
SLA803649	4	53.5951	0.000289609	2.46254	0.445129
SLA776447	4	53.6727	3.96305e-05	5.17536	0.680821
SLA772993	4	53.7095	0.000272899	1.33617	0.391572
SLA797939	4	53.7179	0.000269584	2.42258	0.169433
SLA811533	4	53.7227	0.000346242	11.9605	0.14118
SLA792437	4	53.7467	0.000309452	1.8025	0.221068
SLA810845	4	54.3649	0.000107233	8.89426	0.839358
SLA773220	4	54.3921	1.45316e-05	6.43315	0.725418
SLA775717	4	54.4026	0.000242281	6.31673	0.491238
SLA773402	4	54.4033	0.000158574	4.73865	0.485499
SLA806378	4	54.4034	0.000289287	5.83676	0.254281
SLA777846	4	54.4041	0.00026461	5.4546	0.2821
SLA804309	4	54.4305	0.000114615	4.97153	0.150103
SLA796329	4	54.4496	0.000273903	5.19749	0.307974
SLA785968	4	54.4497	0.000234613	5.93297	0.299886
SLA773116	4	54.4532	0.000232251	5.6813	0.354341
SLA788569	4	54.4781	0.000144804	6.48306	0.661044
SLA774706	4	54.4796	0.000189992	5.46717	0.539613
SLA780409	4	54.4957	0.000120223	8.23318	0.281322
SLA807376	4	54.4961	6.32112e-05	4.54418	0.902162
SLA781697	4	54.5047	7.27141e-05	4.81936	0.594057
SLA786493	4	54.5049	9.31889e-05	4.65273	0.673134
SLA781060	4	54.5064	0.000150528	4.77495	0.490445
SLA784359	4	54.5081	0.000110693	4.38056	0.54248
SLA786466	4	54.5092	0.000117246	4.86529	0.176723
SLA791236	4	54.5117	1.65965e-05	5.09473	0.617184
SLA774692	4	54.5212	7.12987e-05	6.29667	0.886191
SLA788812	4	54.5351	0.000130237	5.05743	0.996781
SLA767937	4	54.5352	1.66663e-06	5.46365	0.784946
SLA794206	4	54.5368	0.000152479	6.64197	0.805822
SLA802889	4	54.5404	0.000101048	7.07611	0.841756
SLA815761	4	54.5454	3.93716e-05	6.85233	0.474569
SLA816606	4	54.5455	7.40381e-05	6.31619	0.195818
SLA802357	4	54.5476	0.000166372	6.89706	0.126137
SLA809608	4	54.5539	5.23859e-05	10.4972	0.277233
SLA810648	4	54.5584	0.000240908	6.66115	0.457539
SLA782876	4	54.5825	0.000106703	10.9964	0.31716
SLA798006	4	54.5829	0.000111735	6.06822	0.208294
SLA784484	4	54.5829	0.000147508	5.97551	0.117635
SLA774385	4	54.583	8.24338e-05	8.50133	0.2818
SLA794385	4	54.586	0.000115999	6.87893	0.848485
SLA794921	4	54.5904	8.6428e-05	8.31406	0.856589
SLA774167	4	54.5919	0.000110355	13.5543	0.946031
SLA808086	4	54.596	6.22116e-05	5.24203	0.839575
SLA776745	4	54.6111	3.34278e-05	6.63792	0.878645
SLA774122	4	54.6114	0.000111056	5.89836	0.756887
SLA781700	4	54.6142	1.06428e-05	4.41989	0.811209
SLA782542	4	54.6152	0.000126778	5.87844	0.538867
SLA777663	4	54.6152	5.49018e-05	6.30316	0.999444
SLA817710	4	54.6218	6.23304e-05	12.5435	0.898019
SLA817325	4	54.6218	0.00010951	12.2296	0.984089
SLA816069	4	54.6239	1.71669e-05	4.75086	0.711197
SLA806592	4	54.63	8.75107e-05	6.36357	0.451135
SLA781382	4	54.6375	3.54319e-05	4.78157	0.991212
SLA776618	4	54.7053	0.000152946	4.91632	0.493546
SLA807057	4	54.7959	0.000129601	4.42247	0.188254
SLA800202	4	54.9169	5.89815e-05	18.71	0.807107
SLA797820	4	55.0042	0.000164413	7.85616	0.72011
SLA811050	4	55.0062	5.67264e-05	4.88364	0.719479
SLA800721	4	55.0291	0.000162538	4.52069	0.496042
SLA802440	4	55.0327	6.1066e-05	5.7897	0.493878
SLA800668	4	55.0668	3.26335e-05	6.42972	0.453695
SLA772943	4	55.0901	8.65871e-05	4.41849	0.432285
SLA815574	4	55.0911	0.000251049	4.46619	0.171556
SLA798527	4	55.1405	6.86666e-07	4.66333	0.582128
SLA795533	4	55.1719	3.5273e-05	7.34818	0.336286
SLA772212	4	55.172	0.000191036	6.19356	0.381608
SLA779954	4	55.1728	6.19711e-05	6.37459	0.798488
SLA806585	4	55.3705	9.88311e-05	5.39674	0.679308
SLA816938	4	55.3903	1.24417e-05	8.25573	0.498051
SLA797416	4	55.393	0.00023133	4.62267	0.311055
SLA806842	4	55.395	4.42211e-05	9.34543	0.632132
SLA817829	4	55.4033	0.000372285	3.83977	0.0727281
SLA813964	4	55.4066	8.97535e-05	6.34371	0.581461
SLA814637	4	55.4078	7.44149e-06	7.21499	0.475778
SLA810224	4	55.4095	6.78874e-05	5.30383	0.323966
SLA800223	4	55.4625	6.54032e-05	15.1175	0.145969
SLA809101	4	55.4747	6.59284e-05	5.42605	0.30226
SLA798062	4	55.501	4.98873e-06	5.00023	0.487363
SLA794281	4	55.5156	0.000158499	8.06743	0.0346445
SLA783062	4	55.8906	8.36532e-05	5.45218	0.992375
SLA774139	4	55.9139	0.000101463	5.20352	0.619693
SLA777898	4	55.9155	0.000130985	5.24757	0.77164
SLA809195	4	55.9189	0.000113223	5.1995	0.794509
SLA801756	4	56.4782	1.56955e-05	8.44156	0.0777846
SLA814952	4	56.5191	0.000377853	4.81344	0.0493101
SLA808729	4	56.534	0.000281479	5.91738	0.0976483
SLA803829	4	56.548	4.62988e-05	13.6032	0.0205241
SLA787986	4	56.5692	0.000273747	7.72617	0.0827601
SLA789255	4	56.5814	0.000205993	17.5504	0.0563895
SLA813751	4	56.6003	0.000229582	7.20401	0.0799117
SLA812604	4	56.6538	0.000241018	14.6628	0.0357554
SLA804293	4	56.6643	6.92904e-05	13.29	0.0121589
SLA769835	4	56.6793	0.00010302	6.6142	0.130062
SLA806248	4	56.6829	0.000148649	12.1294	0.496628
SLA796981	4	56.7738	0.000167895	4.44261	0.423806
SLA796147	4	57.3149	0.000306552	1.19831	0.0159087
SLA786229	4	57.315	0.000299962	0.857459	0.0294701
SLA801474	4	57.315	0.000265683	1.10075	0.0211345
SLA798568	4	57.3151	0.000358033	2.28869	0.0121057
SLA773039	4	57.3157	0.000312266	2.60161	0.019765
SLA812446	4	57.316	0.000254452	2.34586	0.0249728
SLA795251	4	57.317	0.00017527	2.54977	0.031022
SLA796425	4	57.3175	0.000229279	2.40331	0.0433217
SLA781935	4	57.3191	0.000273216	4.71389	0.0353192
SLA784303	4	57.3191	0.000190633	1.53004	0.0249728
SLA812104	4	57.3198	0.000291788	3.36555	0.0184983
SLA769907	4	57.3206	0.00024253	2.18965	0.0148924
SLA804846	4	57.3206	0.000274149	2.61342	0.0176074
SLA812693	4	57.3208	0.000327737	4.1523	0.0128468
SLA788109	4	57.3208	0.000272824	2.5927	0.0183363
SLA798804	4	57.3234	0.000245147	2.69966	0.0184983
SLA814608	4	57.3236	0.000306989	3.40584	0.0202334
SLA811870	4	57.3239	0.000236472	1.89366	0.0311515
SLA812808	4	57.3259	0.000239336	3.72505	0.0356693
SLA808810	4	57.3267	0.000391457	4.48562	0.00556414
SLA801578	4	57.3268	0.000309661	3.14996	0.00907688
SLA801104	4	57.3344	0.000301287	3.6629	0.0122765
SLA786484	4	57.3363	0.000395622	5.06372	0.0111186
SLA769354	4	57.3383	0.000293392	0.731039	0.0252723
SLA798227	4	57.3416	0.000362285	4.0856	0.0093021
SLA807840	4	57.3977	0.000162261	8.24219	0.146519
SLA770155	4	57.6568	0.00029151	2.09079	0.0832085
SLA801016	4	57.6607	0.000268499	1.1677	0.0626929
SLA804944	4	57.6791	0.000184391	6.43812	0.154308
SLA783760	4	57.7507	0.00012585	4.37634	0.302382
SLA776778	4	57.7657	0.00036304	1.07099	0.0217416
SLA786870	4	57.8139	0.000270081	1.56341	0.0684337
SLA815092	4	57.8205	0.000307452	1.69253	0.0623145
SLA787072	4	57.8227	4.63793e-05	5.53173	0.658197
SLA769073	4	57.8295	0.000278457	0.321948	0.133816
SLA774610	4	57.835	0.000310167	1.94682	0.0731176
SLA775946	4	57.854	0.000285799	2.26703	0.161953
SLA807231	4	57.8635	0.000273217	0.156167	0.122715
SLA814120	4	57.873	0.000321573	0.571808	0.225278
SLA788629	4	57.8773	0.000196808	7.19733	0.303292
SLA789276	4	57.9495	0.000218055	12.5965	0.0301459
SLA790352	4	57.9516	0.000102108	6.60707	0.246287
SLA804661	4	57.9535	0.000202315	5.47359	0.184736
SLA785952	4	57.9664	0.000242001	5.55818	0.0826215
SLA771663	4	57.9666	0.000155143	4.7199	0.218171
SLA818732	4	57.9672	0.00017105	5.16793	0.190808
SLA804911	4	58.0148	0.000154126	5.36101	0.127718
SLA816655	4	58.2985	1.11687e-05	6.29895	0.844144
SLA804255	4	58.4567	0.000222701	4.77935	0.145304
SLA806397	4	58.4944	4.08513e-05	5.26409	0.253002
SLA771089	4	58.5003	0.000167564	5.55891	0.291195
SLA812656	4	58.5016	5.17945e-05	7.15241	0.456171
SLA772590	4	58.5177	0.000101507	4.45382	0.263743
SLA799155	4	58.7626	0.000293998	4.28799	0.219391
SLA775821	4	58.7684	0.0003099	3.57336	0.151584
SLA768808	4	58.7795	0.00029523	3.21843	0.370244
SLA794263	4	59.1676	0.000135072	5.36997	0.280863
SLA784173	4	59.3641	9.66334e-06	5.84982	0.82531
SLA803822	4	59.3879	3.30854e-05	6.28091	0.754958
SLA795735	4	59.4132	0.000173272	6.48896	0.519432
SLA793030	4	59.4156	0.000144132	5.17313	0.196603
SLA772748	4	59.4206	0.000181945	7.14131	0.0734036
SLA772928	4	59.4291	5.30829e-05	4.71843	0.595926
SLA804095	4	59.4391	6.40686e-05	13.8355	0.359589
SLA812112	4	59.521	5.0862e-05	5.23794	0.250401
SLA805990	4	59.6915	6.02941e-05	5.87233	0.626316
SLA785424	4	59.8716	0.000136945	8.66661	0.0755702
SLA777779	4	59.9068	3.93654e-05	11.7133	0.631711
SLA782679	4	59.9237	8.11035e-05	4.40774	0.578469
SLA773563	4	60.5012	0.000370852	2.8211	0.0842547
SLA801381	4	60.5238	0.000317033	1.83655	0.115498
SLA773877	4	60.5247	0.000365686	3.43179	0.0441703
SLA785137	4	60.534	0.000348944	1.14904	0.0823494
SLA773380	4	60.5419	0.000283624	2.26754	0.111498
SLA787389	4	60.5603	0.000292126	0.885925	0.117055
SLA813855	4	60.5687	0.000305691	3.4683	0.0798221
SLA815012	4	60.57	0.000355705	3.51749	0.0624955
SLA779037	4	60.5718	0.00027058	2.43225	0.162665
SLA769314	4	60.5729	0.000284207	2.97887	0.123012
SLA808923	4	60.5883	0.000331692	1.50902	0.13959
SLA812046	4	60.5916	0.000403962	2.59758	0.0577973
SLA789538	4	60.5965	0.000298276	0.149219	0.279502
SLA810554	4	62.2429	7.53173e-05	4.2671	0.0463663
SLA808023	4	62.2519	2.38139e-05	19.2026	0.316439
SLA793149	4	63.2277	0.000251048	35.9977	0.0169302
SLA793898	4	63.303	0.000364872	2.07575	0.140634
SLA811742	4	63.3032	0.000309093	8.63844	0.192802
SLA781013	4	63.3035	0.000359442	2.27463	0.103142
SLA812186	4	63.3078	0.000332472	1.66433	0.21872
SLA779821	4	63.3092	0.000363504	12.1721	0.14546
SLA770159	4	63.3108	0.000268131	2.48692	0.183724
SLA804303	4	63.3144	0.000314163	1.87932	0.179583
SLA772784	4	63.3144	0.000276227	1.15356	0.135813
SLA817915	4	63.3144	0.00030341	9.03838	0.222207
SLA814895	4	63.3144	0.000292405	2.37489	0.157251
SLA801699	4	63.3145	0.000287211	4.83186	0.0625806
SLA795178	4	63.3154	0.000167487	20.3866	0.10063
SLA780333	4	63.3156	0.000334991	2.84023	0.115288
SLA791573	4	63.3167	0.00024667	8.45298	0.241372
SLA795819	4	63.3174	0.000273019	2.05678	0.230577
SLA817990	4	63.3174	0.000208516	5.4394	0.332251
SLA800168	4	63.3178	0.00027425	1.65311	0.332701
SLA785818	4	63.3179	0.000324136	2.80467	0.231311
SLA811060	4	63.318	0.000467641	8.08648	0.0241672
SLA786426	4	63.3182	0.000270366	2.07295	0.231311
SLA790872	4	63.3186	0.000269346	1.76594	0.231633
SLA783901	4	63.3192	0.00031584	2.86291	0.127719
SLA812581	4	63.3192	0.000276621	2.47867	0.277905
SLA815902	4	63.3193	0.000116988	5.56459	0.245461
SLA805740	4	63.3193	0.000355571	2.25035	0.128487
SLA788956	4	63.3195	0.000362956	11.3863	0.116792
SLA811421	4	63.3195	0.000103953	6.38519	0.910836
SLA806229	4	63.3196	0.000300454	2.29133	0.214137
SLA786474	4	63.3197	0.000270648	1.39304	0.284556
SLA798124	4	63.3199	0.000337456	2.66487	0.175142
SLA782701	4	63.3199	0.000594566	13.0683	0.00103147
SLA817407	4	63.32	0.00036098	10.4551	0.0954557
SLA775333	4	63.3202	0.00033503	12.468	0.0564793
SLA818200	4	63.3202	0.000447123	17.5475	0.0158375
SLA778835	4	63.3205	0.000316174	9.8132	0.0580909
SLA818078	4	63.3205	0.000395168	11.9281	0.0292364
SLA801553	4	63.3205	0.000308195	2.17141	0.189523
SLA783597	4	63.3206	0.000326636	1.38339	0.189523
SLA797515	4	63.3207	0.000273021	2.20169	0.231633
SLA771008	4	63.3208	0.000287297	1.01708	0.231633
SLA796486	4	63.321	0.000320537	2.50473	0.12562
SLA817869	4	63.3211	0.000396728	2.78043	0.0731678
SLA784653	4	63.3216	0.000344612	7.69744	0.0453097
SLA783278	4	63.3216	0.000304593	1.83776	0.189523
SLA814421	4	63.3219	0.000407987	3.29865	0.0374574
SLA816011	4	63.3225	0.000274053	6.41845	0.104414
SLA806931	4	63.3229	0.000331316	2.42058	0.175142
SLA802462	4	63.324	0.000170426	5.84617	0.152148
SLA791725	4	63.3255	0.00013534	4.64657	0.17734
SLA784697	4	63.3292	0.000299249	1.92823	0.197351
SLA783256	4	63.3303	0.000306088	1.25534	0.335976
SLA769123	4	63.3313	0.000149144	10.4515	0.870711
SLA797136	4	63.332	0.000204746	14.2235	0.388466
SLA790282	4	63.3332	0.000375451	22.6887	0.0343477
SLA795036	4	63.3332	0.000305627	2.60807	0.218201
SLA767566	4	63.3346	0.000136511	4.56637	0.147306
SLA786650	4	63.3351	0.000271085	2.21041	0.231923
SLA794101	4	63.3398	5.15203e-05	8.33418	0.818042
SLA812038	4	63.3399	0.000226458	11.6816	0.241222
SLA786564	4	63.3401	0.000286027	3.49055	0.367181
SLA777093	4	63.3404	2.07663e-06	5.3579	0.621323
SLA802885	4	63.3419	0.000357343	5.72628	0.0611719
SLA780608	4	63.3429	0.000327305	1.99067	0.15966
SLA783929	4	63.3429	0.00028838	2.4571	0.1619
SLA797437	4	63.3431	0.000265348	4.416	0.332653
SLA773646	4	63.3441	0.000314036	1.88381	0.14146
SLA783776	4	63.3446	0.00035099	2.3382	0.118225
SLA771953	4	63.345	0.00027591	1.71782	0.270005
SLA815813	4	63.3454	0.000365405	12.9449	0.330621
SLA790511	4	63.3481	0.00024038	4.46135	0.345584
SLA802170	4	63.3509	0.000301022	-0.351953	0.284556
SLA785883	4	63.3511	0.000255331	8.91133	0.462847
SLA769501	4	63.3529	0.000340723	9.09504	0.162918
SLA777746	4	63.3545	0.000310138	4.38283	0.0438476
SLA780472	4	63.356	0.000150933	13.0658	0.386204
SLA770604	4	63.3562	0.000327198	1.47728	0.238188
SLA793233	4	63.3656	0.000356263	3.19999	0.154025
SLA777682	4	63.3701	0.000379638	16.7397	0.108423
SLA793703	4	63.3704	0.000345589	13.4167	0.0838418
SLA778953	4	63.3704	0.000300993	4.3549	0.170505
SLA810277	4	63.3767	0.000367188	3.87917	0.170505
SLA810781	4	63.3768	0.00029117	1.38289	0.185863
SLA777402	4	63.3782	0.000280654	1.64378	0.309871
SLA772483	4	63.3787	0.000280929	2.01711	0.314868
SLA777338	4	63.3787	0.000301834	2.1805	0.218558
SLA795309	4	63.3798	0.000392422	13.5348	0.112228
SLA779259	4	63.3807	0.000311898	9.62521	0.144601
SLA779497	4	63.3809	0.000321555	2.29682	0.142744
SLA794095	4	63.3813	0.000282737	2.20746	0.249568
SLA777341	4	63.3818	5.27915e-05	8.98878	0.812781
SLA813350	4	63.3825	0.000317204	4.30717	0.150961
SLA791349	4	63.3827	0.000337803	12.7815	0.0953183
SLA811207	4	63.3859	0.000436965	15.9773	0.0976913
SLA793452	4	63.3863	0.000402839	12.8269	0.0702831
SLA800518	4	63.3868	0.000357837	17.9251	0.117919
SLA806029	4	63.388	0.000274844	1.68776	0.295922
SLA793840	4	63.3887	0.00031078	3.27673	0.36682
SLA780779	4	63.3888	0.000276176	2.30075	0.300636
SLA805086	4	63.3893	0.000343763	2.16511	0.24373
SLA788985	4	63.3894	0.000293379	3.07187	0.154848
SLA772524	4	63.3896	0.000305118	3.56275	0.178867
SLA781084	4	63.3903	0.000293562	15.3852	0.0858127
SLA800937	4	63.3903	0.000277066	2.50203	0.164094
SLA784991	4	63.3975	0.000286726	1.35646	0.14146
SLA781665	4	63.3977	0.000319053	9.54359	0.100926
SLA802859	4	63.4033	0.00027532	2.00883	0.258534
SLA791824	4	63.4035	0.000296423	1.08901	0.271085
SLA798089	4	63.4035	0.000155727	4.40708	0.404168
SLA774693	4	63.4045	0.000298553	2.2876	0.306333
SLA775827	4	63.4057	0.000292319	2.74295	0.204678
SLA799946	4	63.4057	0.000285196	3.44212	0.224559
SLA775252	4	63.4064	0.000297534	1.56497	0.355238
SLA774201	4	63.4064	0.000285985	5.9268	0.2978
SLA814222	4	63.408	0.000284037	3.00189	0.250661
SLA789417	4	63.4087	0.000213738	4.8387	0.147306
SLA769231	4	63.409	0.000172867	7.58872	0.397592
SLA792903	4	63.4093	0.000338494	2.08821	0.322032
SLA815540	4	63.4117	0.000164553	5.66822	0.147306
SLA798625	4	63.4131	0.000285725	3.06613	0.202284
SLA788245	4	63.4133	0.000288518	3.74654	0.247705
SLA797390	4	63.415	0.000341252	3.6866	0.202284
SLA775877	4	63.4157	0.00015206	4.81778	0.17204
SLA813276	4	63.4221	0.000167111	4.51891	0.214421
SLA797871	4	63.4238	0.000301392	2.0571	0.251661
SLA788148	4	63.4241	0.000268915	1.96497	0.271085
SLA808919	4	63.4243	0.000298508	2.80693	0.277962
SLA796190	4	63.4266	0.000452063	30.8028	0.00808725
SLA775307	4	63.4284	0.00024092	6.74579	0.0459978
SLA781950	4	63.4297	0.000302018	3.79384	0.18887
SLA804334	4	63.43	1.3492e-05	7.27342	0.250483
SLA771603	4	63.4305	0.000154835	7.47773	0.204955
SLA798594	4	63.4311	0.000317986	5.78961	0.448881
SLA786077	4	63.4311	1.2989e-05	5.51455	0.299783
SLA779917	4	63.4313	0.000166859	7.1589	0.0880354
SLA796352	4	63.4315	0.000329742	19.2566	0.161224
SLA806209	4	63.4321	0.000222616	4.75569	0.408449
SLA801053	4	63.4334	0.000456382	38.0527	0.0321186
SLA804380	4	63.4349	0.000282218	2.18113	0.221066
SLA788533	4	63.4355	0.000173382	4.51517	0.128807
SLA801654	4	63.4356	0.000299721	2.28763	0.347203
SLA809075	4	63.4361	0.000272176	2.65201	0.253562
SLA805153	4	63.4366	0.00028118	1.35935	0.466929
SLA769110	4	63.7192	0.000306855	2.95064	0.420673
SLA773472	4	63.7216	0.000313578	2.66132	0.237579
SLA786395	4	63.7216	0.00031735	1.87533	0.237579
SLA789497	4	63.7277	0.000243211	5.12576	0.0868434
SLA808871	4	63.7353	0.000316599	12.8305	0.408314
SLA816323	4	63.7424	0.000120419	5.73594	0.337561
SLA800291	4	63.7452	8.18359e-05	5.00267	0.471574
SLA793719	4	63.7506	7.39725e-06	8.12656	0.83002
SLA772431	4	63.7528	0.000222863	6.12499	0.030966
SLA814357	4	63.753	0.000271749	5.93745	0.030966
SLA803192	4	63.7534	0.000278366	2.04994	0.324435
SLA769249	4	63.7536	0.000314409	4.61606	0.277515
SLA795394	4	63.7546	5.78011e-05	5.25715	0.87636
SLA813062	4	63.7546	0.000269	1.27507	0.297098
SLA783981	4	63.7559	6.60143e-05	8.312	0.422635
SLA794020	4	63.756	0.000144631	4.4909	0.568806
SLA787620	4	63.7563	0.000283793	2.39481	0.284344
SLA795189	4	63.757	0.000274433	2.07991	0.324267
SLA793306	4	63.7585	0.000315649	2.96133	0.299741
SLA772429	4	63.7585	0.000310393	2.34794	0.342759
SLA782111	4	63.7586	0.000295837	2.65302	0.299741
SLA784063	4	63.7596	0.000289038	2.77958	0.284344
SLA788376	4	63.76	0.000225057	6.21163	0.167014
SLA778292	4	63.7618	0.000305862	1.4601	0.285683
SLA802379	4	63.7649	0.000357822	14.3597	0.179052
SLA798174	4	63.7655	0.000300564	3.74529	0.212684
SLA794781	4	63.7662	0.0002972	2.12501	0.299741
SLA810976	4	63.7682	0.000141862	4.73971	0.726488
SLA800164	4	63.7697	0.000319874	3.31834	0.19037
SLA770253	4	63.7731	0.000359269	5.47422	0.117787
SLA813856	4	63.7732	0.000409159	6.59864	0.0727261
SLA781601	4	63.7732	0.000292676	4.94245	0.229439
SLA788704	4	63.7733	0.000538	33.5162	0.00903189
SLA804206	4	63.7733	0.000198176	10.5478	0.6109
SLA771495	4	63.7733	0.000364739	4.7529	0.245062
SLA808175	4	63.7741	0.000239994	6.58911	0.41062
SLA776011	4	63.7764	0.000282449	18.3173	0.165179
SLA779103	4	63.7871	7.5553e-05	4.53658	0.326607
SLA784140	4	63.8787	0.00018834	2.96701	0.0404272
SLA806241	4	63.9069	0.000151454	2.97655	0.0473959
SLA783698	4	63.9099	0.000504946	7.57012	0.0174248
SLA791206	4	63.9505	5.04334e-05	5.27687	0.922679
SLA775235	5	1.83126	0.000387815	1.00815	0.0459806
SLA810719	5	1.85152	0.000288374	-0.41069	0.124052
SLA804332	5	1.85485	0.000279378	1.30366	0.259643
SLA785824	5	1.99142	0.000277429	3.52629	0.1337
SLA812784	5	2.02966	0.000321428	-0.0736503	0.110627
SLA774365	5	2.06811	0.000279534	-0.0960722	0.151638
SLA814127	5	2.89995	0.000305673	1.77772	0.435248
SLA795487	5	2.95466	0.000268406	1.91873	0.540248
SLA785464	5	2.99126	0.000283104	1.64449	0.587846
SLA816339	5	3.02795	0.000348412	9.09472	0.270076
SLA782745	5	3.43399	0.000125528	10.0828	0.196223
SLA808115	5	3.44509	5.98963e-05	5.57627	0.528
SLA769508	5	3.54102	5.49796e-05	5.23455	0.450272
SLA790371	5	3.56355	3.86346e-05	5.53193	0.848431
SLA815920	5	3.58137	0.000132528	7.85348	0.096451
SLA767658	5	3.61977	8.68829e-05	7.23613	0.435164
SLA782721	5	3.63059	4.87731e-05	6.773	0.725001
SLA787953	5	3.63069	4.07804e-05	4.54847	0.482248
SLA771809	5	3.6774	2.69947e-05	10.0639	0.62133
SLA792635	5	3.80928	0.000207503	9.12972	0.0472194
SLA772420	5	3.82122	2.57126e-05	-1.67648	0.0451797
SLA798187	5	3.84355	5.36498e-05	0.746608	0.0451797
SLA784385	5	3.84926	0.000284242	3.99149	0.0479925
SLA774425	5	3.86367	1.95996e-05	5.52302	0.657912
SLA778058	5	3.87214	0.000165845	5.40135	0.0362669
SLA796129	5	3.91971	4.20743e-05	6.88447	0.902588
SLA790355	5	3.96848	0.000169487	-9.32643	0.021848
SLA801011	5	3.98118	0.000120615	4.48886	0.108643
SLA796648	5	3.98602	1.74166e-05	4.76365	0.992502
SLA779822	5	4.24493	0.000316938	0.30004	0.183319
SLA776135	5	4.6482	0.000657266	3.48593	0.00901644
SLA786441	5	5.5583	0.000310482	3.45014	0.460941
SLA794010	5	7.0531	0.000301165	0.90977	0.211586
SLA771377	5	7.7582	0.000267624	1.69491	0.299645
SLA784080	5	9.03684	0.000226413	4.53455	0.154461
SLA808835	5	10.4635	0.000173914	5.04041	0.26927
SLA798154	5	10.5239	0.00014168	6.38554	0.26372
SLA788281	5	14.3733	1.76591e-05	5.05245	0.643283
SLA808874	5	17.8021	0.000227711	4.55381	0.105627
SLA792180	5	21.4606	8.51428e-05	6.50887	0.450694
SLA774758	5	57.7893	8.37073e-05	7.19213	0.375661
SLA812651	5	58.04	8.80014e-05	9.01592	0.294579
SLA796796	5	58.9222	0.000216843	12.5133	0.0201306
SLA796897	5	59.0041	0.000221825	0.771698	0.0497776
SLA783719	5	59.0169	0.000188455	1.24804	0.0456366
SLA802323	5	59.0665	0.000273541	1.91769	0.0310815
SLA769695	5	59.0689	0.000152242	1.50375	0.0490012
SLA810633	5	59.0704	0.000159425	-0.0126944	0.0473635
SLA800639	5	59.0708	0.000222466	0.895448	0.0422566
SLA810318	5	59.071	0.000218205	0.182617	0.0422566
SLA809931	5	59.0717	0.000198927	-1.37976	0.0422566
SLA805541	5	59.0718	0.000205916	1.16455	0.0343889
SLA778840	5	59.074	0.000194209	1.12449	0.0422566
SLA777722	5	59.0813	0.000219801	2.17632	0.0111129
SLA774265	5	59.0856	0.000286381	4.43296	0.0367033
SLA772609	5	59.0863	0.000253571	-0.163454	0.0347153
SLA778080	5	59.0915	0.000193219	0.226168	0.0461849
SLA774195	5	59.0924	0.000246123	1.89503	0.048698
SLA772456	5	59.094	0.000179015	0.955488	0.0277503
SLA774639	5	59.0942	0.000227881	0.547031	0.0346935
SLA800544	5	59.0963	0.000233233	9.48784	0.0258068
SLA809504	5	59.0971	0.000135447	-1.10762	0.0402628
SLA789422	5	59.0972	0.000197404	0.704474	0.0453236
SLA782134	5	59.1035	0.000254381	0.169158	0.0347153
SLA783084	5	59.1101	0.000107489	6.61487	0.305082
SLA813419	5	59.1107	0.000227663	0.842158	0.0387882
SLA799091	5	59.1112	0.000218062	0.675904	0.0427119
SLA808065	5	59.3937	0.000202739	5.40115	0.104259
SLA807411	5	59.4034	0.000264789	0.547748	0.0285528
SLA771235	5	59.4053	0.000110577	5.77506	0.178309
SLA779043	5	59.4315	0.000231675	7.57435	0.0719011
SLA785886	5	59.7462	0.000166533	4.69725	0.0803693
SLA783151	5	59.8173	0.000116319	5.56305	0.29111
SLA769100	5	59.9281	0.000338899	8.06249	0.0397567
SLA796457	5	60.0245	0.000208031	1.70489	0.0389712
SLA786638	5	60.0549	0.000148787	1.43241	0.0389712
SLA770642	5	60.068	0.000265012	3.26568	0.0166893
SLA799455	5	60.1366	0.000199197	1.31552	0.0275973
SLA796478	5	60.1411	0.000248594	1.8752	0.018668
SLA802724	5	60.2101	2.70923e-05	7.31137	0.51137
SLA788138	5	60.216	0.000228647	2.07673	0.0278974
SLA780202	5	60.2744	0.000209852	3.23556	0.0187592
SLA801860	5	60.275	0.000255117	3.08722	0.0129415
SLA801485	5	60.2976	0.000231155	2.112	0.0170797
SLA783119	5	60.2976	0.000229732	3.23737	0.0170797
SLA792353	5	60.3054	0.000120092	1.24806	0.0245431
SLA780211	5	60.3129	0.000237379	2.5814	0.0133142
SLA777875	5	60.3129	0.000263542	3.99755	0.0133142
SLA786745	5	60.3201	0.000237385	1.82835	0.028018
SLA796485	5	60.321	0.000199367	2.28668	0.0375249
SLA791751	5	60.3218	0.000104217	8.14688	0.0952294
SLA794894	5	60.3225	0.000212352	3.67879	0.0133142
SLA807953	5	60.3245	0.000279362	3.32386	0.0167037
SLA797679	5	60.3263	0.000273421	6.03154	0.012153
SLA770873	5	60.3447	0.000107598	4.47586	0.184699
SLA801014	5	60.3451	0.000220902	2.25619	0.0346798
SLA809553	5	60.3466	0.000265368	0.877998	0.0365769
SLA798629	5	60.4222	0.000149963	7.1694	0.466872
SLA796838	5	60.4245	0.000262821	7.69262	0.0921952
SLA803301	5	60.6341	1.86937e-05	5.51794	0.723693
SLA800685	5	60.6631	8.06259e-06	5.10917	0.580475
SLA797470	5	60.6771	4.80781e-05	6.15348	0.626827
SLA818269	5	60.6771	6.73343e-05	8.31386	0.710883
SLA789668	5	60.6933	4.47344e-05	5.81576	0.914517
SLA809686	5	60.7641	7.28936e-05	6.60593	0.2086
SLA803133	5	60.7978	3.02493e-05	5.18485	0.866474
SLA772818	5	60.8012	6.09479e-05	7.91352	0.466012
SLA785650	5	60.8546	0.000147674	20.3264	0.0644898
SLA795302	5	60.9322	0.000180672	6.7286	0.0238224
SLA784279	5	60.9661	5.89345e-05	7.29967	0.382935
SLA784428	5	60.9761	5.86109e-05	7.59709	0.689043
SLA783892	5	60.9771	0.000109896	6.54271	0.223252
SLA792256	5	62.2136	0.00021248	17.5692	0.220981
SLA779463	5	62.3476	0.000229418	14.6542	0.215611
SLA792627	5	62.3541	0.000134074	8.37351	0.167703
SLA782074	5	62.8197	0.000229265	4.68804	0.207689
SLA793425	5	62.8594	0.000317514	4.16581	0.242159
SLA777440	5	62.8857	0.000126572	5.44188	0.332592
SLA777925	5	63.1047	0.000280603	3.45283	0.402506
SLA790326	5	63.1733	0.000348574	0.0482356	0.069711
SLA781114	5	63.272	0.000208038	5.11739	0.0555938
SLA816605	5	63.5055	0.000290109	10.2938	0.0619555
SLA806963	5	63.717	3.87086e-06	4.79233	0.91038
SLA774783	5	63.7173	1.42309e-05	4.64876	0.8877
SLA774825	6	0.52492	1.76238e-05	4.73552	0.583405
SLA809248	6	0.728623	4.39425e-05	5.64103	0.133177
SLA782214	6	0.848456	9.02089e-05	7.82143	0.699907
SLA772691	6	1.2141	6.93264e-05	4.67587	0.293722
SLA794535	6	2.09308	4.55577e-05	5.26503	0.380819
SLA778838	6	2.10174	0.000210869	4.85301	0.0863252
SLA811660	6	2.10341	0.000180986	9.74107	0.0651973
SLA772210	6	2.83462	0.000279218	2.88761	0.0684822
SLA788683	6	2.83942	0.000240101	3.66117	0.0354983
SLA785862	6	2.84705	0.000194752	2.93749	0.0344197
SLA803599	6	2.8472	0.000201162	3.01676	0.0397999
SLA795185	6	2.84815	0.00024991	4.61667	0.0625633
SLA815563	6	2.8483	0.000267701	7.12597	0.0227373
SLA818383	6	2.85448	7.97259e-05	5.32171	0.415455
SLA818416	6	2.85448	9.93877e-05	5.60877	0.176001
SLA778866	6	2.85676	0.000267944	4.88048	0.054017
SLA792161	6	2.85813	0.000127435	11.6152	0.0734144
SLA769826	6	2.86034	0.000131546	5.76943	0.148125
SLA779596	6	2.86038	0.000228157	0.856731	0.0432317
SLA782437	6	2.86516	0.000105633	13.9543	0.28831
SLA781113	6	2.86667	0.000199616	6.25694	0.0317876
SLA783529	6	2.86797	0.000202152	0.581613	0.0404336
SLA814675	6	2.86825	0.000280592	1.16195	0.0522673
SLA796122	6	2.87125	0.000268956	1.70597	0.0427713
SLA811186	6	2.87949	0.00022844	8.78658	0.0128907
SLA790641	6	2.89166	0.000276425	5.06008	0.0783797
SLA772801	6	2.89376	0.000268676	2.79665	0.110167
SLA773242	6	2.89459	0.00017337	5.11914	0.165123
SLA798912	6	2.91074	0.000253588	5.04837	0.0549507
SLA815554	6	2.92005	0.000223911	1.65386	0.0471705
SLA768064	6	2.92116	0.000245434	4.52164	0.0469452
SLA811206	6	2.92556	5.79166e-05	8.2554	0.263571
SLA786839	6	3.0691	0.000176589	7.96853	0.666754
SLA811411	6	3.26507	0.000363741	5.61609	0.0793072
SLA802854	6	3.29131	0.000422577	4.35362	0.099075
SLA807194	6	3.29992	0.000295651	1.95709	0.365532
SLA800059	6	3.31192	0.000323581	2.13257	0.190267
SLA782510	6	3.31203	0.000327924	2.26534	0.363274
SLA780886	6	3.31461	0.000356878	3.2297	0.169147
SLA775970	6	3.36962	0.000199454	2.22256	0.0204229
SLA802804	6	3.37491	0.000516005	3.1247	0.0227934
SLA804737	6	3.42478	0.000191654	5.52997	0.105456
SLA791467	6	4.69758	0.000262144	0.362152	0.0101824
SLA798074	6	4.70206	0.000203006	1.48529	0.0187845
SLA770277	6	4.81235	0.000213751	-0.116484	0.0322107
SLA792342	6	4.88472	0.000154209	6.02022	0.332792
SLA816583	6	4.88551	0.000263488	-2.30674	0.0118431
SLA814049	6	5.34765	0.000317728	5.68507	0.135761
SLA811792	6	5.34808	0.000309062	0.464192	0.00800701
SLA814531	6	5.3558	0.000170647	1.50939	0.028118
SLA776316	6	5.3977	0.000348353	3.58782	0.097453
SLA772442	6	5.42042	0.000298181	-0.386232	0.0194167
SLA796514	6	5.42309	0.000234455	-1.50578	0.0153675
SLA808478	6	5.4394	0.000359932	3.49734	0.12452
SLA775485	6	5.46074	0.000229067	4.94451	0.0555442
SLA816115	6	5.50839	0.000140973	4.91647	0.0214703
SLA796308	6	5.56925	0.000242725	6.96046	0.0184571
SLA799092	6	5.68587	0.00021181	7.57323	0.0350331
SLA798338	6	5.74671	0.000165695	1.40047	0.0486648
SLA805741	6	6.17578	0.000270773	0.792225	0.0171013
SLA776244	6	6.22077	0.000179915	0.235906	0.0148773
SLA776323	6	6.25951	0.000163112	5.75232	0.0340424
SLA777109	6	6.26336	0.000256845	5.84709	0.0227099
SLA790167	6	8.28843	0.000213467	1.64068	0.0348683
SLA789942	6	8.31309	1.12846e-05	4.52808	0.878869
SLA812125	6	9.42221	0.000123671	4.46519	0.0956933
SLA785463	6	9.4628	0.000240515	1.80326	0.0173727
SLA816317	6	9.49121	0.000202113	8.06569	0.0823786
SLA810771	6	9.50541	0.000245924	6.68223	0.0468374
SLA781478	6	9.84988	0.000238453	-0.496171	0.0101824
SLA806900	6	9.85083	0.000253326	24.3608	0.032148
SLA777252	6	10.6703	8.55697e-05	5.00098	0.552903
SLA815028	6	10.7753	0.00021985	0.138957	0.0153675
SLA810287	6	11.3452	0.000114903	5.77574	0.24634
SLA807317	6	11.3455	0.000239976	4.38096	0.174768
SLA795370	6	11.6194	0.00029498	2.45763	0.00967323
SLA778526	6	11.75	0.00026771	2.30671	0.011244
SLA769196	6	12.0395	0.000174007	0	0.0348683
SLA803563	6	12.5794	0.000143283	8.77792	0.148187
SLA807773	6	13.8948	0.000291599	0.906199	0.029651
SLA779655	6	14.739	0.000119802	4.77387	0.233626
SLA800103	6	16.6515	3.26993e-05	5.77682	0.677645
SLA800734	6	16.6942	0.000158158	8.68932	0.0507355
SLA797954	6	16.767	0.000245719	4.13498	0.00691903
SLA793248	6	16.9051	0.000235061	-0.899612	0.0278512
SLA778365	6	16.9117	0.000215774	0.827954	0.0303352
SLA794196	6	17.1847	0.000239425	1.58101	0.0102401
SLA805170	6	17.1887	0.000265012	3.10738	0.00937537
SLA800983	6	17.3435	0.000212624	24.0354	0.0940855
SLA769218	6	17.5142	0.000253059	0.331065	0.0194167
SLA804382	6	17.5229	0.000202785	5.96344	0.0488449
SLA780676	6	17.5784	0.00020356	-0.0642966	0.0059252
SLA784805	6	17.7578	0.000103981	5.52174	0.466777
SLA785552	6	17.758	0.000191895	8.71536	0.0970683
SLA805523	6	17.8097	0.000313819	5.55658	0.245109
SLA807256	6	17.8457	0.000104291	4.821	0.167497
SLA777725	6	17.8459	0.000219766	2.08806	0.0306324
SLA795194	6	17.9121	0.000312954	2.15831	0.0296424
SLA800231	6	19.1835	0.000136755	11.4831	0.341648
SLA815544	6	19.1955	0.000231459	4.19282	0.0416951
SLA776596	6	19.1957	0.000325809	2.57244	0.181177
SLA770008	6	19.3984	0.000201659	0.712652	0.0464262
SLA799721	6	19.4723	0.000205194	1.64274	0.0312652
SLA802745	6	19.4737	0.000128199	5.20416	0.524421
SLA793444	6	19.603	0.000238088	0.851488	0.0173727
SLA807326	6	19.666	8.016e-06	5.09692	0.838303
SLA772683	6	19.6672	0.000265555	1.13088	0.0178707
SLA778493	6	19.6733	0.000336572	-0.771067	0.0139739
SLA768054	6	19.6735	0.000200337	-0.52876	0.0397618
SLA780559	6	19.7275	3.61542e-05	4.72601	0.864107
SLA810755	6	19.9451	0.000239016	1.63194	0.00753936
SLA788259	6	19.9962	0.000304998	3.32482	0.243317
SLA801127	6	20.2028	0.000240577	-0.121556	0.00933984
SLA804781	6	20.2055	0.000303245	0.0809503	0.0206502
SLA787888	6	20.2225	0.000250075	2.49839	0.00146252
SLA781787	6	20.259	0.000241786	11.0365	0.0107192
SLA804367	6	20.3956	3.64792e-07	4.39625	0.912689
SLA806182	6	20.4121	0.000271919	1.75399	0.0173727
SLA768553	6	20.4795	0.000246427	2.11016	0.0416377
SLA811631	6	20.486	0.000282609	2.25701	0.0074323
SLA805622	6	20.4931	0.000318735	1.13371	0.161458
SLA800256	6	20.6018	9.40329e-06	6.05291	0.951019
SLA790069	6	20.6579	0.000282976	1.76314	0.0266918
SLA816313	6	20.6876	0.000253145	1.09074	0.0194167
SLA767772	6	20.6891	0.000157446	3.28739	0.0450933
SLA803592	6	20.6911	0.000243173	-1.02062	0.0151577
SLA780566	6	20.6996	0.000213746	-0.427945	0.0371367
SLA810876	6	20.7021	0.000151741	4.91704	0.280185
SLA803029	6	20.7629	0.000281424	-0.100146	0.0151577
SLA784415	6	20.7764	0.000264277	-0.870075	0.0156608
SLA785177	6	20.7767	0.000270329	-0.262089	0.00811294
SLA811066	6	20.945	0.000225978	2.01477	0.0173076
SLA788864	6	20.982	0.00011395	4.59505	0.353756
SLA769376	6	21.1118	0.000220709	6.03945	0.260108
SLA772545	6	21.1723	0.000335734	10.2938	0.0104501
SLA785371	6	21.2879	0.000306281	0.637181	0.0242686
SLA806252	6	21.3269	0.000323848	4.99061	0.227716
SLA788413	6	21.4612	9.54579e-05	8.38288	0.339718
SLA812130	6	21.4695	0.000254639	0.344479	0.0117277
SLA773786	6	21.4752	0.000495006	11.8098	0.0184125
SLA787802	6	21.5823	3.15446e-05	5.72744	0.779946
SLA781055	6	21.5904	0.000167823	11.6728	0.219106
SLA794920	6	21.5967	0.000245766	-0.127723	0.00800701
SLA802761	6	21.724	0.000243333	1.25204	0.0139739
SLA771798	6	21.746	0.000264438	-0.989691	0.0173727
SLA807697	6	21.8071	0.000384802	7.32396	0.0349894
SLA798288	6	21.8117	0.000244473	2.23884	0.0288871
SLA801384	6	21.8545	0.000183318	4.41154	0.0289136
SLA800627	6	21.9795	0.00018412	2.42656	0.0399221
SLA795892	6	22.0155	0.000190136	2.67584	0.0302618
SLA814749	6	22.058	0.000308147	0.794524	0.0156608
SLA791361	6	22.2506	9.21341e-05	6.02508	0.479379
SLA782922	6	22.3747	0.000254059	-1.13363	0.00893267
SLA793786	6	22.4206	0.000203573	0.441051	0.0494141
SLA770614	6	22.6095	0.000273819	1.65768	0.01158
SLA787267	6	22.6148	0.000220665	-0.567529	0.0259123
SLA779842	6	22.6193	0.00029453	1.64409	0.0138153
SLA784508	6	22.6203	0.000264457	1.21342	0.0153675
SLA773959	6	22.6221	9.32767e-05	5.01373	0.600868
SLA810653	6	22.7175	0.000237853	6.28439	0.00254175
SLA782149	6	25.1602	0.000181912	6.0622	0.145314
SLA784058	6	27.7167	0.000315481	5.793	0.00450176
SLA773836	6	27.7224	0.000247871	4.08579	0.0349005
SLA787982	6	27.7236	0.000192922	2.85987	0.0218479
SLA812498	6	27.7434	0.000280926	3.24407	0.0038294
SLA792158	6	27.7437	0.000364547	21.9199	0.00811675
SLA810552	6	27.7466	0.000322471	0.94812	0.00718718
SLA799164	6	27.7496	0.00033309	9.45169	0.00126205
SLA808128	6	27.7502	0.000239632	6.83845	0.00568822
SLA798335	6	27.7525	0.000259104	1.90137	0.0161628
SLA784159	6	27.7573	0.000186977	0.337161	0.0400172
SLA814737	6	27.7611	0.000248408	2.5082	0.00844855
SLA775568	6	27.7636	0.000232169	1.64409	0.020613
SLA799642	6	27.7797	0.000259026	4.73302	0.114938
SLA769220	6	27.7996	0.000357577	10.3816	0.0113994
SLA794120	6	27.8024	0.000331321	10.1179	0.0130926
SLA795493	6	27.8291	0.000249002	3.59251	0.015073
SLA784154	6	27.8405	0.000220148	0.722096	0.0331583
SLA793690	6	27.8407	0.00017433	2.71199	0.0209294
SLA803015	6	27.8414	0.00025127	2.78141	0.00844855
SLA768984	6	27.843	0.000256472	2.56146	0.0161628
SLA810794	6	27.8521	0.000208179	1.69357	0.0303319
SLA795088	6	27.8627	0.000244893	6.20849	0.0382328
SLA786773	6	27.8646	0.000135618	2.27028	0.0485218
SLA810308	6	27.9055	0.000163747	4.86931	0.266349
SLA796243	6	27.9146	9.29536e-05	-1.28253	0.0487929
SLA802324	6	27.9151	0.000191274	1.12389	0.0344686
SLA771901	6	27.9177	7.51313e-05	4.77625	0.746566
SLA792552	6	27.928	0.000112957	-1.00001	0.0487929
SLA808274	6	27.9617	0.000177691	-0.801903	0.0357554
SLA778024	6	27.9834	0.000142953	-0.633038	0.0487929
SLA773557	6	28.0351	2.84493e-05	5.98642	0.545684
SLA772389	6	28.0717	0.000110517	8.10734	0.181093
SLA769574	6	28.101	5.64985e-05	8.58838	0.595829
SLA794229	6	28.1196	4.0579e-05	5.21717	0.369106
SLA808087	6	28.1199	0.00011328	5.1777	0.476945
SLA796801	6	28.1221	0.000155987	7.24216	0.0997827
SLA771875	6	28.249	0.000122296	4.54085	0.682343
SLA775283	6	28.2808	0.000170531	1.08771	0.0322583
SLA784569	6	28.3058	1.31577e-05	5.78925	0.744104
SLA787731	6	28.3207	0.000111848	-1.0516	0.0395479
SLA776620	6	28.351	0.000225017	2.72773	0.00903748
SLA771114	6	28.3515	0.000163784	2.09721	0.0160643
SLA791024	6	28.3521	0.000128729	34.8543	0.0217328
SLA784828	6	28.377	0.000266368	8.34562	0.0101067
SLA793684	6	28.3829	2.60006e-05	6.2262	0.256738
SLA787719	6	28.3843	0.000162833	1.03237	0.0160643
SLA803443	6	28.4025	0.000150476	0	0.0487929
SLA810263	6	28.4174	0.000220204	-1.36053	0.00977742
SLA806332	6	28.4181	0.000120444	0.897877	0.0487929
SLA797750	6	28.434	0.000127008	-0.32337	0.0203407
SLA790092	6	28.5134	3.51299e-05	8.88327	0.636627
SLA790806	6	28.5627	0.000178824	2.16116	0.0253033
SLA804092	6	28.614	0.000180513	0.832619	0.0225329
SLA810690	6	28.6156	6.23106e-06	7.11999	0.980714
SLA775289	6	28.6158	0.00019975	-1.83057	0.0280541
SLA809225	6	28.6293	0.000120455	10.199	0.220716
SLA789628	6	28.6611	0.000177539	7.37772	0.11003
SLA776589	6	28.6739	0.000107034	-0.783355	0.0394723
SLA818651	6	28.6752	0.000194951	1.70476	0.0164747
SLA813956	6	28.6758	0.000197491	5.15834	0.0225559
SLA816163	6	28.6778	0.000206592	1.09444	0.0346865
SLA818395	6	28.681	2.20721e-05	7.4933	0.981462
SLA782914	6	28.6874	4.50802e-05	-1.50441	0.0129356
SLA792770	6	28.7477	7.27023e-06	7.06786	0.60285
SLA777164	6	28.7569	0.000213598	0.484184	0.0225329
SLA768668	6	28.7583	0.000201405	3.51028	0.0284947
SLA811643	6	28.7718	0.000176342	0.557124	0.0225329
SLA795400	6	28.7788	0.000189274	0.187993	0.0453299
SLA773678	6	28.7922	0.000140321	6.76235	0.272953
SLA776461	6	28.7928	0.00026983	1.39249	0.0491545
SLA783370	6	28.7932	0.000196497	-0.70436	0.0222887
SLA812058	6	28.7933	0.000181995	10.6964	0.161351
SLA774368	6	28.9728	0.000160824	0.345661	0.024463
SLA802523	6	29.0286	8.76686e-05	6.31623	0.984173
SLA800674	6	29.061	1.2304e-05	5.15611	0.614301
SLA807881	6	29.0623	0.000136003	12.0367	0.307975
SLA780871	6	29.0818	0.000239257	-1.01275	0.0206834
SLA779635	6	29.1623	0.00014196	-0.618415	0.0462349
SLA782016	6	29.1633	3.94215e-05	6.88117	0.569062
SLA783452	6	29.1717	0.000170435	1.31796	0.0225329
SLA808699	6	29.1769	0.000232254	1.01768	0.0112773
SLA792738	6	29.1836	0.000197955	0.374804	0.0173695
SLA772853	6	29.2135	7.8201e-05	17.631	0.883045
SLA775018	6	29.2998	0.000145149	-4.09761	0.0267522
SLA774818	6	29.3	5.98671e-05	5.90711	0.724364
SLA767755	6	29.3032	0.000198647	-1.05858	0.0355762
[truncated: 1,535 more rows]
